# Supplementary material
Source: publisher site journal article supplement (https://www.dovepress.com/article/501445)
Supplement: Supplementary file 1 [file get_supplementary_file.php]

# Supplemental e-material

eTable 1. List of Abbreviations

eTable 2. Search strategy

eTable 3. Characteristics of 180 included studies reporting the diagnostic estimates of NITs for diagnostics of NAFLD

eTable 4. Pairwise Meta-Analysis of diagnostic accuracy for NAFLD with references

eTable 5. 27 NITs diagnostic for steatosis ≥S1 ANOVA model analysis results with references

eTable 6. 4 NITs diagnostic for steatosis ≥S2 ANOVA model analysis results with references

eTable 7. 40 NITs diagnostic for NAFL vs. NASH ANOVA model analysis results with references

eTable 8. 15 NITs diagnostic for NAFLD with fibrosis ANOVA model analysis results with references

eTable 9. 40 NITs diagnostic for NAFLD ≥F2 ANOVA model analysis results with references

eTable 10. 64 NITs diagnostic for Advanced fibrosis (≥F3) ANOVA model analysis results with references

eTable 11. 14 NITs diagnostic for High-risk NASH (NAS≥4, ≥F2) ANOVA model analysis results with references

| **eTable 1. List of Abbreviations** | | | |
| --- | --- | --- | --- |
| **Abbreviations** | **Definition** | **Abbreviations** | **Definition** |
| 2D-SWE | Two-Dimensional Shear Wave Elastography | M2BPGi | Mac-2 Binding Protein Glycosylation Isomer |
| A1AT | α1-Antitrypsin | MACK-3 | a blood test including 3 biomarkers (aspartate aminotransferase, homeostasis model assessment, and cytokeratin 18) |
| AAR score | Aspartate Aminotransferase-to-Alanine Aminotransferase Ratio Score | MASEF | Metabolomics-Advanced StEatohepatitis Fibrosis Score |
| AC | acoustic coefficient | MEFIB | MRE plus FIB-4 |
| ADAPT | A fibrosis algorithm that included Age, presence of DiAbetes, PRO-C3, and plaTelet count | MRE | Magnetic Resonance Elastography |
| AFABP | Adipocyte Fatty Acid-Binding Protein | MRI | Magnetic Resonance Imaging |
| ALT | Alanine Aminotransferase | MR-MASH | MRI based composite biomarker of Proton Density Fat Fraction and waist circumference |
| aMAP | Age-Male Albumin-bilirubin-Platelets score | MRS | Magnetic Resonance Spectroscopy |
| AP index | Age-Platelet Index | NAFL | Non-Alcoholic Fatty Liver Simple Steatosis |
| APRI | Aspartate aminotransferase–platelet ratio | NAFLD | Non-Alcoholic Fatty Liver Disease |
| ARFI | Acoustic Radiation Force Impulse | NAFLD-FM | FibroMeter NAFLD |
| ASMase | Acid Sphingomyelinase | NASH | Non-Alcoholic Steatohepatitis |
| AST | Aspartate Aminotransferase | NFI | NAFLD Fibrosis Index |
| ATI | Atenuation Imaging | NFS | NAFLD fibrosis score |
| AUC | Area Under the receiver operating characteristic Curve | NIKEI | Non-Invasive Koeln-Essen-index |
| C13 | Carbon-13 | NI-NASH-DS | Non-Invasive NASH Detection Score |
| CK-18 | Cytokeratin-18 Fragment | NITs | Non-Invasive Tests |
| CK18-M30 | Cytokeratin-18 Fragment M30 | NLV | Normalized Local Variance |
| CK18-M65 | Cytokeratin-18 Fragment M65 | NLV-SD | Standard Deviation of Normalized Local Variance |
| DOR | Diagnostic Odds Ratio | NMA | Network Meta-Analysis |
| ElastPQ | Point shear wave Elastography | P4NP 7S | Procollagen Type IV N-terminal Propeptide 7S |
| ELF | Enhanced Liver Fibrosis score | PC | Phosphatidylcholine |
| F2 | Fibrosis Stage 2 | PDFF | Proton Density Fat Fraction |
| F3 | Fibrosis Stage 3 | PLT | Platelet Count |
| FAI | Fat Attenuation Parameters | PRO-C3 | Procollagen Type III N-terminal Propeptide |
| FAST | FibroScan-Aspartate Aminotransferase Score | PRO-C4 | Procollagen Type IV C-terminal Propeptide |
| FGF21 | Fibroblast Growth Factor 21 | PRO-C6 | Procollagen Type VI C-terminal Propeptide |
| FIB4 | Fibrosis-4 Index | p-SWE | Point-Shear Wave Elastography |
| FIB6 | Fibrosis-6 Index | RBP4 | Retinol-Binding Protein 4 |
| FIB8 | Fibrosis-8 Index | RPR | Width-to-Platelet Ratio |
| FLI | Fatty Liver Index | RTE | Real-Time Elastography |
| FNI | Fibrotic NASH index | S Index | Superiority Index |
| GGT | Gamma-Glutamyl Transferase | S1 | Steatosis Stage 1 |
| GP73 | Golgi Protein 73 | S2 | Steatosis Stage 2 |
| HA | Hyaluronic Acid | SAN | Screening Algorithm for NASH |
| H-MRS | Hydrogen Magnetic Resonance Spectroscopy | SHG | Second Harmonic Generation |
| HRI | Hepatorenal index | SWE | Shear Wave Elastography |
| HsCRP | Hypersensitive C-reactive protein | SWS | Shear Wave Speed |
| HSI | Hepatic Steatosis Index | TE | Transient Elastography |
| IgA | Immunoglobulin A | THE | Transient Hepatic Elastography |
| ION | Index of NASH | TyG | Triglyceride and Glucose Index |
| LEARN | the bioeLectrical impEdance Analysis foR Nash | UAP | Ultrasound Attenuation Parameter |
| LFS | the enhanced liver fibrosis score | UGAP | Ultrasound-Guided Attenuation Parameter |
| LPR | the LSM/Platelet Ratio | VAI | Visceral Adiposity Index |
| M2BP | Mac-2 Binding Protein |  |  |

| **eTable 2. Search strategy** | | |
| --- | --- | --- |
| **PubMed** | | |
| 1 | **((((((((((((((Non-alcoholic Fatty Liver Disease[MeSH Terms]) OR (Non alcoholic Fatty Liver Disease[Title/Abstract])) OR (NAFLD[Title/Abstract])) OR (Nonalcoholic Fatty Liver Disease[Title/Abstract])) OR (Fatty Liver, Nonalcoholic[Title/Abstract])) OR (Fatty Livers, Nonalcoholic[Title/Abstract])) OR (Liver, Nonalcoholic Fatty[Title/Abstract])) OR (Livers, Nonalcoholic Fatty[Title/Abstract])) OR (Nonalcoholic Fatty Liver[Title/Abstract])) OR (Nonalcoholic Fatty Livers[Title/Abstract])) OR (Nonalcoholic Steatohepatitis[Title/Abstract])) OR (Steatohepatitides, Nonalcoholic[Title/Abstract])) OR (Steatohepatitis, Nonalcoholic[Title/Abstract])) OR (MAFLD[Title/Abstract])) OR (MASLD[Title/Abstract])** | 44,390 |
| 2 | (((((((Diagnosis[MeSH Terms]) OR (Diagnoses[Title/Abstract])) OR (Diagnose[Title/Abstract])) OR (Diagnoses[Title/Abstract])) OR (Examinations[Title/Abstract])) OR (Examinations Diagnoses[Title/Abstract])) OR (Diagnoses and Examination[Title/Abstract])) OR (Examination and Diagnoses[Title/Abstract]) | 9,697,385 |
| 3 | (Non-invasive) OR (Serological markers) | 131,145 |
| 4 | ((Sensitivity and Specificity[MeSH Terms]) OR (Sensitivity[Title/Abstract])) OR (Specificity[Title/Abstract]) | 1,727,159 |
| 5 | (((((((((((((((((((((((Biomarkers[MeSH Terms]) OR (Marker, Biological[Title/Abstract])) OR (Biological Marker[Title/Abstract])) OR (Biologic Marker[Title/Abstract])) OR (Marker, Biologic[Title/Abstract])) OR (Biological Markers[Title/Abstract])) OR (Biologic Markers[Title/Abstract])) OR (Markers, Biologic[Title/Abstract])) OR (Biomarker[Title/Abstract])) OR (Markers, Biological[Title/Abstract])) OR (Serum Markers[Title/Abstract])) OR (Markers, Serum[Title/Abstract])) OR (Marker, Serum[Title/Abstract])) OR (Serum Marker[Title/Abstract])) OR (Markers, Clinical[Title/Abstract])) OR (Marker, Clinical[Title/Abstract])) OR (Biochemical Marker[Title/Abstract])) OR (Markers, Biochemical[Title/Abstract])) OR (Marker, Biochemical[Title/Abstract])) OR (Biochemical Markers[Title/Abstract])) OR (Markers, Laboratory[Title/Abstract])) OR (Laboratory Markers[Title/Abstract])) OR (Laboratory Marker[Title/Abstract])) OR (Marker, Laboratory[Title/Abstract]) | 1,040,518 |
| 6 | #2 OR #3 OR #4 OR #5 | 11,165,085 |
| 7 | #1 AND #6 | 16,915 |
| 8 | ((((((meta[Title]) OR (systematic review[Title])) OR (mice[Title])) OR (rat[Title])) OR (rabbit[Title])) OR (review[Title])) OR (randomized[Title]) | 1,995,984 |
| 9 | #7 NOT #8 Filters: Clinical Study, Clinical Trial, Controlled Clinical Trial, Multicenter Study, Observational Study, Validation Study, Humans | 1414 |
| **Embase** | | |
| 1 | 'nonalcoholic fatty liver'/exp OR 'non alcoholic fatty liver disease':ti,ab,kw OR 'nafld':ti,ab,kw OR 'nonalcoholic fatty liver disease':ti,ab,kw OR 'fatty liver, nonalcoholic':ti,ab,kw OR 'fatty livers, nonalcoholic':ti,ab,kw OR 'liver, nonalcoholic fatty':ti,ab,kw OR 'livers, nonalcoholic fatty':ti,ab,kw OR 'nonalcoholic fatty liver':ti,ab,kw OR 'nonalcoholic fatty livers':ti,ab,kw OR 'nonalcoholic steatohepatitis':ti,ab,kw OR 'nonalcoholic steatohepatitides':ti,ab,kw OR 'steatohepatitides, nonalcoholic':ti,ab,kw OR 'steatohepatitis, nonalcoholic':ti,ab,kw OR 'mafld':ti,ab,kw OR 'masld':ti,ab,kw | 83,849 |
| 2 | 'sensitivity and specificity'/exp OR 'sensitivity':ti,ab,kw OR 'specificity':ti,ab,kw | 1,851,839 |
| 3 | 'diagnosis'/exp OR 'diagnoses':ti,ab,kw OR 'diagnose':ti,ab,kw OR 'diagnoses and examinations':ti,ab,kw OR 'examinations and diagnoses':ti,ab,kw OR 'diagnoses and examination':ti,ab,kw OR 'examination and diagnoses':ti,ab,kw | 8,775,054 |
| 4 | 'biological marker'/exp or 'non invasive measurement'/exp or 'Non-invasive':ti,ab,kw OR 'Serological markers':ti,ab,kw OR 'Marker, Biological':ti,ab,kw OR 'Biological Marker':ti,ab,kw OR 'Biologic Marker':ti,ab,kw OR 'Marker, Biologic':ti,ab,kw OR 'Biological Markers':ti,ab,kw OR 'Biologic Markers':ti,ab,kw OR 'Markers, Biologic':ti,ab,kw OR 'Biomarker':ti,ab,kw OR 'Markers, Biological':ti,ab,kw OR 'Serum Markers':ti,ab,kw OR 'Markers, Serum':ti,ab,kw OR 'Marker, Serum':ti,ab,kw OR 'Serum Marker':ti,ab,kw OR 'Markers, Clinical':ti,ab,kw OR 'Marker, Clinical':ti,ab,kw OR 'Biochemical Marker':ti,ab,kw OR 'Markers, Biochemical':ti,ab,kw OR 'Marker, Biochemical':ti,ab,kw OR 'Biochemical Markers':ti,ab,kw OR 'Markers, Laboratory':ti,ab,kw OR 'Laboratory Markers':ti,ab,kw OR 'Laboratory Marker':ti,ab,kw OR 'Marker, Laboratory':ti,ab,kw | 845,082 |
| 5 | #2 OR #3 OR #4 | 10,382,522 |
| 6 | #1 AND #5 | 36,020 |
| 7 | 'meta':ti OR 'systematic review':ti OR 'mice':ti OR 'rat':ti OR 'rabbit':ti OR 'review':ti OR 'randomized':ti | 2,329,573 |
| 8 | #6 AND 'diagnostic test accuracy study'/de | 2,746 |
| 9 | #8 NOT #7 | 2,636 |
| **Cochrane Central Register of Controlled Trials** | | |
| 1 | MeSH descriptor: [Non-alcoholic Fatty Liver Disease] explode all trees | 1,669 |
| 2 | (Non alcoholic Fatty Liver Disease):ti,ab,kw OR (NAFLD):ti,ab,kw OR (Nonalcoholic Fatty Liver Disease):ti,ab,kw OR (Fatty Liver, Nonalcoholic):ti,ab,kw OR (Fatty Livers, Nonalcoholic):ti,ab,kw (Word variations have been searched) | 4,564 |
| 3 | (Liver, Nonalcoholic Fatty):ti,ab,kw OR (Livers, Nonalcoholic Fatty):ti,ab,kw OR (Nonalcoholic Fatty Liver):ti,ab,kw OR (Nonalcoholic Fatty Livers):ti,ab,kw OR (Nonalcoholic Steatohepatitis):ti,ab,kw (Word variations have been searched) | 4,765 |
| 4 | (Nonalcoholic Steatohepatitides):ti,ab,kw OR (Steatohepatitides, Nonalcoholic):ti,ab,kw OR (Steatohepatitis, Nonalcoholic):ti,ab,kw OR (MAFLD):ti,ab,kw OR (MASLD):ti,ab,kw (Word variations have been searched) | 1,903 |
| 5 | #1 OR #2 OR #3 OR #4 | 5,074 |
| 6 | MeSH descriptor: [Diagnosis] explode all trees | 448,828 |
| 7 | (Diagnoses):ti,ab,kw OR (Diagnose):ti,ab,kw OR (Diagnoses and Examinations):ti,ab,kw OR (Examinations and Diagnoses):ti,ab,kw OR (Diagnoses and Examination):ti,ab,kw (Word variations have been searched) | 249,987 |
| 8 | MeSH descriptor: [Sensitivity and Specificity] explode all trees | 19,968 |
| 9 | (Examination and Diagnoses):ti,ab,kw OR (Non-invasive):ti,ab,kw OR (Serological markers):ti,ab,kw OR (Sensitivity):ti,ab,kw OR (Specificity):ti,ab,kw (Word variations have been searched) | 278,734 |
| 10 | MeSH descriptor: [Biomarkers] explode all trees | 27,066 |
| 11 | (Marker, Biological):ti,ab,kw OR (Biological Marker):ti,ab,kw OR (Biologic Marker):ti,ab,kw OR (Marker, Biologic):ti,ab,kw OR (Biological Markers):ti,ab,kw (Word variations have been searched) | 8,400 |
| 12 | (Biologic Markers):ti,ab,kw OR (Markers, Biologic):ti,ab,kw OR (Biomarker):ti,ab,kw OR (Markers, Biological):ti,ab,kw OR (Serum Markers):ti,ab,kw (Word variations have been searched) | 66,831 |
| 13 | (Markers, Serum):ti,ab,kw OR (Marker, Serum):ti,ab,kw OR (Serum Marker):ti,ab,kw OR (Markers, Clinical):ti,ab,kw OR (Marker, Clinical):ti,ab,kw (Word variations have been searched) | 46,427 |
| 14 | (Biochemical Marker):ti,ab,kw OR (Markers, Biochemical):ti,ab,kw OR (Marker, Biochemical):ti,ab,kw OR (Biochemical Markers):ti,ab,kw OR (Markers, Laboratory):ti,ab,kw (Word variations have been searched) | 8,784 |
| 15 | (Laboratory Marker):ti,ab,kw OR (Marker, Laboratory):ti,ab,kw (Word variations have been searched) | 4,149 |
| 16 | #6 OR #7 OR #8 OR #9 OR #10 OR #11 OR #12 OR #13 OR #14 | 801,851 |
| 17 | #5 AND #16 in Trials | 2,894 |
| 18 | (randomized):ti OR (mice):ti OR (rat):ti | 443,846 |
| 19 | #17 NOT #18 | 2,104 |
| **CNKI** | | |
| 1 | ((SU=非酒精性脂肪性肝病 OR SU=NAFLD OR SU=MASLD OR SU=肝癖) AND (SU=无创 OR SU=非侵入 OR SU=诊断 OR SU=筛查 OR SU=评估 OR SU=灵敏度 OR SU=特异度 OR SU=生物标志物 OR SU=血清学标志物)) NOT (TI=进展 OR TI=现状 OR TI=综述 OR TI=meta OR TI=系统评价 OR TI=共识 OR TI=指南 OR TI=规律 OR TI=经验 OR TI=鼠 OR TI=兔) | 2,215 |
| **SinoMed** | | |
| 1 | "非酒精性脂肪性肝病"[不加权:扩展] | 17,029 |
| 2 | "肝癖"[常用字段:智能] OR "NAFLD"[常用字段:智能] OR "MASLD"[常用字段:智能] OR "MAFLD"[常用字段:智能] | 57,633 |
| 3 | (#2) OR (#1) | 17,659 |
| 4 | "无创"[常用字段:智能] OR "非侵入"[常用字段:智能] OR "诊断"[常用字段:智能] OR "筛查"[常用字段:智能] OR "评估"[常用字段:智能] OR "灵敏度"[常用字段:智能] OR "特异度"[常用字段:智能] OR "生物标志物"[常用字段:智能] OR "血清学标志物"[常用字段:智能] | 14,841,725 |
| 5 | (#4) AND (#3) | 8,138 |
| 6 | (#5) AND ( 临床试验[文献类型] OR 多中心研究[文献类型]) AND ( 人类[特征词]) | 1,288 |
| **VIP** | | |
| 1 | ((M=非酒精性脂肪性肝病 OR M=肝癖 OR M= NAFLD OR M=MAFLD OR M=MASLD OR R=非酒精性脂肪性肝病 OR R=肝癖 OR R= NAFLD OR R=MAFLD OR R=MASLD) AND (M=无创 OR M=非侵入 OR M=诊断 OR M=筛查 OR M=评估 OR M=灵敏度 OR M=特异度 OR M=生物标志物 OR M=血清学标志物 OR R=无创 OR R=非侵入 OR R=诊断 OR R=筛查 OR R=评估 OR R=灵敏度 OR R=特异度 OR R=生物标志物 OR R=血清学标志物)) NOT (T=进展 OR T=现状 OR T=综述 OR T=meta OR T=系统评价 OR T=共识 OR T=指南 OR T=规律 OR T=经验 OR T=鼠 OR T=兔) | 2,418 |
| **WangFang** | | |
| 1 | ((主题:(非酒精性脂肪性肝病) or 主题:(肝癖) or 主题:(MASLD) or 主题:(NAFLD)) and (主题:(无创) or 主题:(非侵入) or 主题:(诊断) or 主题:(筛查) or 主题:(评估) or 主题:(灵敏度) or 主题:(特异度) or 主题:(生物标志物) or 主题:(血清学标志物))) not (题名:(进展) or 题名:(现状) or 题名:(综述) or 题名:(meta) or 题名:(系统评价) or 题名:(共识) or 题名:(指南) or 题名:(规律) or 题名:(经验) or 题名:(鼠) or 题名:(兔)) | 3,802 |

| **eTable 3. Characteristics of 180 included studies reporting the diagnostic estimates of NITs for diagnostics of NAFLD** | | | | | | | | | | | | | | |
| --- | --- | --- | --- | --- | --- | --- | --- | --- | --- | --- | --- | --- | --- | --- |
| **No.** | **Study ID** | **Country** | **Sample size** | **Diagnostic modalities** | **No.** | **Study ID** | **Country** | **Sample size** | **Diagnostic modalities** | **No.** | **Study ID** | **Country** | **Sample size** | **Diagnostic modalities** |
| 1 | FangDG20231 | China | 80 | PC | 61 | CuiJ20152 | USA | 102 | FIB4, 2D-MRE | 121 | ZhaoYN20223 | China | 34 | NLV, NLV-SD |
| 2 | CaoDR20124 | China | 52 | H-MRS | 62 | Cengiz20155 | Turkey | 123 | RPR | 122 | Duman20236 | Turkey | 119 | FIB4, VCTE, MRE |
| 3 | LuWJ20227 | China | 64 | MRE | 63 | LeeJS20228 | Sweden | 251 | LSM, APRI, FIB4, NFS, FAST | 123 | Yoneda20139 | Japan | 235 | AAR score, APRI, BARD, FIB4, NFS |
| 4 | RenH202210 | China | 72 | MRE | 64 | Nasr201511 | Sweden | 58 | AAR score, APRI, BARD, FIB4, NFS, Albumin, Prothrombin-INR, GUCI | 124 | Kakisaka201812 | Japan | 125 | APRI, FIB4, Forns index |
| 5 | YangRN202313 | China | 198 | PDFF, MRI-R2 | 65 | Naveau201714 | France | 317 | CAP | 125 | Ogino202315 | Japan | 107 | 2D-SWE, SMPA |
| 6 | LiGH202116 | China | 100 | LSM, FAI, VTQ | 66 | QuY202117 | China | 377 | LSM, UAP | 126 | Bertot202318 | Australia | 271 | LSM, APRI, FIB4, NFS, Hepascore |
| 7 | LiS201219 | China | 29 | AAR score, APRI, BARD | 67 | Mahsen201520 | Egypt | 60 | CK-18 | 127 | Patricia 202221 | Spain | 115 | SAN |
| 8 | HuY201922 | China | 57 | FIB4, NFS, HsCRP | 68 | HuangJF201723 | China | 76 | CK-18 | 128 | Seki 201624 | Japan | 171 | P4NP 7S, TE |
| 9 | LiYD202025 | China | 91 | GP73 | 69 | Feldstein200926 | USA | 139 | CK-18 | 129 | Noureddin 202227 | USA | 855 | FAST, MASEF |
| 10 | WangL202328 | China | 155 | MRI-R2 | 70 | Tavaglione202329 | Italy, Finland, Italy, UK | 6949 | FIB4, FNI | 130 | Sharpton 202130 | USA | 114 | VCTE, 2D-SWE |
| 11 | HeZX202231 | China | 120 | LSM, FIB4, Fasting C-peptide | 71 | Martino201432 | Italy | 27 | MRS, PDFF, FibroMeter NAFLD Score | 131 | ShenJY202133 | China-HK | 220 | CK-18, FGF21, FM |
| 12 | WangM201834 | China | 61 | LSM, ARFI | 72 | Boursier 201535 | France | 588 | LSM, APRI, BARD, FIB4, NFS, FibroTest, Hepascore, Fibrometer V2G | 132 | Tapper201636 | Israel | 193 | NFS, VCTE |
| 13 | ZhangDK201237 | China | 67 | ARFI | 73 | Seko202238 | Japan | 371 | FIB4, ELF, M2BPGi | 133 | JangTY202139 | China | 80 | FIB4 |
| 14 | SunLL201740 | China | 124 | Liver Young′s modulus | 74 | ZhaoGD202241 | China | 84 | FIB4, NFS, FAST | 134 | Okajima201642 | Japan | 163 | LSM, AAR score, APRI, FIB4, NFS, P4NP 7S, PLT, NAFIC, LPR |
| 15 | ZhangSQ202443 | China | 47 | RTE | 75 | Sanyal202344 | USA | 1073 | FIB4, NIS, ELF, VCTE, PROC3 | 135 | Carmen202245 | Romania | 146 | C13 |
| 16 | FuYM202246 | China | 405 | CAP | 76 | Dincses201547 | Turkey | 52 | NFS, VCTE, TE | 136 | Reviere 202248 | France | 238 | TyG |
| 17 | HeSL202249 | China | 100 | LSM, APRI, FIB4 | 77 | ZhaoYN202350 | China | 75 | SWS, AC, NLV | 137 | Jafarov202051 | Turkey | 139 | LSM |
| 18 | SongXG202052 | China | 80 | LSM, CAP | 78 | Guillaume201953 | France | 417 | ELF, Fibrometer V2G | 138 | ChanWK201754 | HK, Malaysia | 79 | CAP |
| 19 | TianS201955 | China | 42 | CK-18, FGF21 | 79 | Imajo202256 | Japan | 201 | VCTE, MRE, 2D-SWE | 139 | Taibbi202157 | Italy | 46 | TE, p-SWE |
| 20 | TianYY201858 | China | 98 | sH2a, sICAM-1 | 80 | Yang XY202259 | China | 279 | APRI, BARD, FIB4, NFS, NFI | 140 | Prasoppokakorn202260 | China, Malaysia, Thailand | 511 | FIB4, NFS, FIB8 |
| 21 | LiY201561 | China | 98 | APRI, FIB4, IgA | 81 | Hendy201962 | Egypt | 510 | ALT, mi-RNA 122, mi-RNA 34a, mi-RNA 99a | 141 | Joanna 201063 | Poland | 103 | BARD |
| 22 | LiL201164 | China | 70 | RBP4 | 82 | LuM202365 | China | 172 | TE | 142 | Canivet 202366 | China, France, Italy, Australia, Belgium, Malaysia, Finland | 1924 | MACK-3, FAST |
| 23 | YuPR202167 | China | 126 | FIB4, ASMase | 83 | DeA202268 | India | 60 | FIB4, NFS, ELF, FAST | 143 | Sumida 201269 | Japan | 576 | AAR score, APRI, BARD, FIB4, NFS |
| 24 | GaoJ201970 | China | 87 | ASMase | 84 | Byron201671 | Sweden | 158 | APRI, BARD, Forns index, NIKEI, GUCI, LINKI, KING score, Lok index | 144 | Ome 201372 | Mexico | 228 | AAR score, APRI, BARD, FIB4, NFS |
| 25 | GeGY202073 | China | 86 | CK18-M30, CK18-M65 | 85 | Furlan 201974 | USA | 62 | MRE, 2D-SWE, TE | 145 | YangM201975 | China | 453 | APRI, BARD, FIB4, NFS |
| 26 | YangM201476 | China | 90 | IL-1RA | 86 | Kaya202077 | Turkey | 462 | FIB4, NFS | 146 | Joshua201878 | UK | 26 | LFS |
| 27 | ZhangDK201379 | China | 67 | APRI, ARFI | 87 | Moon202380 | korea | 231 | APRI, FIB4, NFS, M2BPGi | 147 | Ogawa201881 | Japan | 165 | AAR score, APRI, BARD, FIB4, NFS |
| 28 | ChenXY201682 | China | 308 | APRI, HSI | 88 | LiJH202383 | USA | 104 | MRE | 148 | Yilmaz200784 | Turkey | 83 | CK18-M30, CK18-M65 |
| 29 | LengXJ201885 | China | 238 | LSM, FIB4, NFS, Hui score, Forns index | 89 | KimBK202286 | Japan、USA | 563 | FAST, MAST, MEFIB | 149 | Fujimori 201887 | Japan | 186 | APRI, FIB4, P4NP 7S, Autotaxin, HA |
| 30 | XieX201988 | China | 63 | CAP | 90 | Inadomi202089 | Japan | 200 | ELF | 150 | Marta202090 | Spain | 119 | Marta2020 |
| 31 | HuangJS202291 | China | 95 | PDFF | 91 | JiaX202392 | China | 922 | C-DAG | 151 | Younes201793 | Italy | 292 | ION |
| 32 | ZhangYL201794 | China | 96 | APRI, BARD, NFS, BAAT | 92 | Noureddin202295 | USA | 548 | LSM, FIB4, Agile 3+ | 152 | Zain202096 | Malaysia | 122 | AAR score, APRI, BARD, FIB4, NFS |
| 33 | Leivas 202197 | Brazil | 227 | Ultrasound | 93 | FengG202198 | China | 278 | APRI, FIB4, NFS, LRM | 153 | Rommel202099 | Peru | 379 | FIB4, NFS, Hepamet |
| 34 | Harrison 2020100 | USA, other 8 European countries | 3454 | APRI, FIB4, NFS, NIS, ELF, VCTE | 94 | XunYH2012101 | China | 152 | AAR score, APRI, BARD, FIB4, NFS | 154 | ZhengKI2020102 | China | 105 | GP73, CK18-M30 |
| 35 | Vali 2023103 | Austria, Belgium, Finland, France, Germany, Greece, Italy, the Netherlands, Portugal, Spain, Sweden, Switzerland, UK | 5074 | LSM, CK18-M30, CK18-M65, SomaSignal, ADAPT, MACK-3, PRO-C3, FIBC-3, CAO2013, PRO-C6, PRO-C4 | 95 | Adams2011104 | Australia,Italy | 242 | APRI, BARD, FIB4, FibroTest, Hepascore | 155 | Alqahtani2020105 | USA | 584 | APRI, FIB4, NFS |
| 36 | Semmler2020106 | Austria | 319 | CAP | 96 | Victor2016107 | China, UK | 261 | CAP | 156 | Daniel2019108 | Australia, Japan, UK | 431 | PRO-C3 |
| 37 | López2017109 | Spanish | 57 | ELF | 97 | LeongWL2019110 | Malaysia | 122 | TE, p-SWE | 157 | Erhardtsen2021111 | USA | 215 | PRO-C3 |
| 38 | Sheth 2019112 | India | 288 | LSM, FIB4, HAALT scoring system, MRE | 98 | Inada2022113 | Japan | 105 | FIB4, MRE | 158 | Huber2019114 | Germany | 41 | PRO-C3 |
| 39 | Shalimar 2019115 | India | 219 | CAP | 99 | Woreta2022116 | USA | 585 | FAST | 159 | LuoY2018117 | NR | 164 | PRO-C3 |
| 40 | Tovo 2019118 | Brazil | 104 | APRI, FIB4, NAFLD score, THE | 100 | Kiyoaki2022119 | Japan | 93 | FIB4, M2BPGi | 160 | Nielsen2021120 | USA, Australia, China, European centres | 517 | PRO-C3 |
| 41 | Ratziu 2006121 | France | 267 | FibroTest | 101 | Kawamura2012122 | Japan | 30 | APRI, BARD, FIB4, 3D-MRI | 161 | Boyle2019123 | European centres | 449 | PRO-C3 |
| 42 | Poynard 2006124 | France | 257 | NashTest | 102 | Kosick2020125 | Canada | 407 | AAR score, APRI, BARD, FIB4, NFS, VCTE | 162 | TangLJ2022126 | China | 851 | PRO-C3 |
| 43 | Boursier 2019127 | France | 313 | BARD, NFS, VCTE, FM | 103 | Koroda2020128 | Japan | 125 | CAP, UGA, ATI | 163 | Wibulpolprasert2024129 | Thailand | 50 | PDFF |
| 44 | Zhou J2022130 | China | 139 | 2D-SWE | 104 | Lassailly2011131 | France | 295 | SteatoTest, ActiTest | 164 | Middleton2019132 | USA | 110 | PDFF |
| 45 | KimJW2022-a133 | Korea | 60 | CAP, 2D-SWE, HRI, TE | 105 | Verma2013134 | USA | 238 | ALT | 165 | Imajo2016135 | Japan | 127 | TE |
| 46 | KimJW2022-b136 | Korea | 47 | MRS, PDFF | 106 | Mohammad2016137 | USA | 125 | AAR score, APRI, BARD, FIB4, NFS, BAAT, NAFLD-FM | 166 | Middleton2017138 | USA | 113 | PDFF |
| 47 | LiG2023139 | China | 766 | LEARN | 107 | JooSK2017140 | Korea | 324 | AAR score, APRI, BARD, FIB4, NFS, ARFI | 167 | ShaoCX2021141 | China | 102 | TE |
| 48 | aykut2014142 | Turkey | 88 | TE, FibroMeter NAFLD Score, HsCRP | 108 | Roccarina2022143 | UK | 159 | ElastPQ, F-TE | 168 | TangA2013144 | USA | 77 | PDFF |
| 49 | Ali 2021145 | USA | 315 | Ali2021 | 109 | RongF2023146 | China | 946 | LSM, aMAP, Agile | 169 | TangA2015147 | USA | 81 | PDFF |
| 50 | Tavaglione2021148 | Italy | 120 | CAP, FAST | 110 | Marti2023149 | Spain | 194 | MR-MASH | 170 | Yoneda2010150 | Japan | 54 | ARFI |
| 51 | Singh2019151 | USA | 1157 | FIB4, NFS, AAR score, APRI | 111 | Loomba2014152 | USA | 117 | 2D-MRE | 171 | Braticevici153 | Romania | 84 | ARFI |
| 52 | Ahn2019154 | korea | 1480 | Clinical-CT index, CTL-S | 112 | Park CC2017155 | USA | 103 | CAP, MRE, TE, PDFF | 172 | Cassinotto2015156 | French | 291 | ARFI |
| 53 | Fedchuk 2014157 | France | 324 | NFS, TyG, FLI, VAI, HSI | 113 | McPherson2014158 | UK | 285 | FIB4, NFS, IgA, BAAAP | 173 | CuiJ2015159 | USA | 125 | ARFI |
| 54 | Younossi 2022160 | USA | 463 | FIB4, ELF, M2BP | 114 | Anushiravani2023161 | Egypt, Iran, Saudi Arabia, Greece, Turkey, Oman | 2468 | FIB6, UAP | 174 | Darweesh2019162 | Egypt | 60 | TE |
| 55 | Caussy 2018163 | USA | 156 | FIB4, NFS, 10 metabolitites, Caussy 2018 | 115 | Siddiqui2018164 | USA | 1904 | AAR score, APRI, FIB4, NFS | 175 | Friedrich2012165 | Germany | 57 | TE |
| 56 | Chan WK2014166 | Malaysia | 113 | CK18-M30, ALT, AST, GGT | 116 | ZhuSH2020167 | China | 497 | UAP | 176 | Karlas2015168 | Germany | 41 | ARFI |
| 57 | Chang PE2018169 | 10 Asia country | 83 | SHG B-index | 117 | YangXY021170 | China | 91 | LSM | 177 | Palmeri2011171 | USA | 172 | APRI, ARFI |
| 58 | Halina 2012172 | Poland | 126 | BARD, NFS | 118 | Polyzos2018173 | Greece | 31 | APRI, ELF | 178 | LeeMS2017174 | Korea | 94 | ARFI, TE |
| 59 | ZangSF2016175 | China | 86 | A1AT | 119 | Runge2017176 | Netherlands | 55 | CAP, PDFF | 179 | Echeverria L177 | Brazil | 128 | FNI |
| 60 | ZhangH2022178 | France, Greece, Australia, China, Malaysia, Switzerland, Turkey | 920 | CK18-M30 | 120 | Cunha2020179 | USA | 81 | MRI-M, MRI-C | 180 | Eren F2022180 | Turkey | 560 | FIB-4, NFS |

| **eTable 4. Pairwise Meta-Analysis of diagnostic accuracy for NAFLD with references** | | | | | |
| --- | --- | --- | --- | --- | --- |
| **Subgroups** | **NITs** | **Sensitivity (95%CI)** | **Specificity (95%CI)** | **DOR (95%CI)** | **AUC (95%CI)** |
| NAFLD ≥F3 | AAR 9, 11, 42, 69, 72, 96, 101, 125, 137, 140, 151, 164 | 0.60[0.50, 0.69] | 0.70[0.61, 0.77] | 3[2, 6] | 0.70[0.65-0.73] |
| APRI 8, 11, 12, 18, 35, 42, 59, 69, 71, 72, 75, 82, 87, 96, 101, 104, 105, 118, 122, 125, 137, 140, 151, 164 | 0.59[0.47, 0.87] | 0.82[0.74, 0.87] | 6[4, 10] | 0.79[0.75-0.82] |
| BARD 9, 11, 35, 59, 63, 69, 71, 72, 75, 96, 101, 122, 125, 137, 140, 172 | 0.69[0.60, 0.76] | 0.67[0.60, 0.73] | 4[3, 6] | 0.73[0.69-0.77] |
| FIB4 2, 8, 9, 11, 12, 18, 35, 42, 59, 69, 75, 77, 87, 95, 96, 101, 104, 105, 118, 122, 125, 127, 137, 140, 151, 158, 163, 164 | 0.63[0.52, 0.74] | 0.87[0.81, 0.92] | 12[8, 17] | 0.84[0.81-0.87] |
| NFS 8, 9, 11, 18, 35, 36, 42, 59, 69, 72, 75, 77, 96, 101, 105, 125, 127, 137, 140, 151, 163, 164, 172 | 0.66[0.53, 0.78] | 0.82[0.73, 0.88] | 9[5, 14] | 0.82[0.78-0.85] |
| PRO-C3108, 111, 114, 117, 120, 123, 126 | 0.71[0.61, 0.79] | 0.74[0.66, 0.80] | 7[5, 9] | 0.79[0.75, 0.82] |
| MRE 2, 7, 10, 56, 74, 152, 155 | 0.86[0.80, 0.90] | 0.91[0.86, 0.94] | 60[31, 119] | 0.93[0.90, 0.95] |
| TE 2, 8, 17, 18, 24, 30, 35, 36, 42, 51, 56, 57, 65, 74, 95, 110, 125, 127, 142, 143, 146, 155, 174 | 0.88[0.83, 0.91] | 0.80[0.75, 0.84] | 28[18, 45] | 0.91[0.88, 0.93] |
| ARFI 34, 37, 140, 150, 153, 156, 159, 171, 174 | 0.83[0.76, 0.88] | 0.87[0.81, 0.91] | 32[22, 47] | 0.92[0.89, 0.94] |
| NAFLD ≥F2 | APRI 8, 12, 80, 81, 82, 98, 104, 164, 173 | 0.73[0.66, 0.79] | 0.66[0.59, 0.73] | 5[4, 7] | 0.75[0.71-0.79] |
| NFS 8, 47, 60, 80, 81, 98, 99, 158, 164 | 0.69[0.58, 0.78] | 0.75[0.66, 0.83] | 7[4, 12] | 0.79[0.75-0.82] |
| FIB4 6, 8, 12, 44, 60, 80, 81, 98, 99, 104, 113, 160, 164 | 0.64[0.52, 0.75] | 0.83[0.72, 0.91] | 9[5, 15] | 0.80[0.76, 0.83] |
| MRE 6, 10, 56, 74, 81, 113, 152, 155 | 0.84[0.76, 0.90] | 0.86[0.79, 0.91] | 31[21, 46] | 0.92[0.89, 0.94] |
| PRO-C3 44, 108, 111, 114, 117, 120 | 0.59[0.48, 0.68] | 0.85[0.80, 0.89] | 8[6, 12] | 0.83[0.80, 0.86] |
| TE 6, 30, 44, 47, 56, 57, 74, 81, 110, 133, 143, 155, 168, 174 | 0.76[0.67, 0.83] | 0.80[0.75, 0.84] | 12[9, 17] | 0.85[0.81, 0.88] |
| ARFI 34, 37, 79, 153, 156, 159, 168, 174 | 0.73[0.61, 0.82] | 0.82[0.69, 0.90] | 12[7, 20] | 0.83[0.80, 0.86] |
| NASH vs. NAFL | CK18-M30 49, 73, 102 | 0.67[0.54, 0.78] | 0.90[0.80, 0.96] | 18[9, 38] | 0.86[0.83-0.89] |
| Steatosis (≥S1) | TE 14, 46, 52, 54, 88, 106, 115, 128, 135, 141, 148, 155, 176 | 0.85[0.80, 0.89] | 0.85[0.79, 0.89] | 31[17, 56] | 0.92[0.89, 0.94] |
| PDFF 13, 32, 135, 141, 144, 147, 155, 176 | 0.92[0.88, 0.94] | 0.86[0.75, 0.92] | 66[27, 157] | 0.95[0.93, 0.96] |
| Steatosis (≥S2) | PDFF 129, 132, 136, 138, 155 | 0.88[0.82, 0.93] | 0.88[0.82, 0.92] | 55[27, 112] | 0.89[0.86, 0.92] |

| **eTable 5. 27 NITs diagnostic for steatosis ≥S1 ANOVA model analysis results with references** | | | | | | | |
| --- | --- | --- | --- | --- | --- | --- | --- |
| No. | NITs | Sensitivity (95%CI) | Specificity (95%CI) | DOR (95%CI) | S (95%CI) | Relative Sensitivity (95%CI) | Relative Specificity (95%CI) |
| 1 | H-MRS4, 32 | 0.81(0.59, 0.95) | 0.98(0.83, 1) | 15745657.6(17.2, 1014063.59) | 21.36(0.52, 49) | 1 | 1 |
| 2 | NLV3 | 0.74(0.4, 0.95) | 0.93(0.57, 1) | 515080.28(3.05, 295953.65) | 12.36(0.04, 47) | 0.93(0.48, 1.37) | 0.96(0.58, 1.15) |
| 3 | NLV-SD3 | 0.72(0.38, 0.93) | 0.93(0.57, 1) | 325159.91(2.71, 395626.93) | 10.23(0.03, 45) | 0.9(0.45, 1.36) | 0.96(0.59, 1.15) |
| 4 | ALT166 | 0.84(0.59, 0.97) | 0.91(0.65, 1) | 722.13(7.48, 3133.23) | 16.59(0.16, 47) | 1.06(0.7, 1.5) | 0.94(0.66, 1.13) |
| 5 | TyG157 | 0.74(0.42, 0.93) | 0.88(0.53, 1) | 241.24(2.56, 1229.06) | 5.84(0.03, 39) | 0.93(0.52, 1.36) | 0.9(0.55, 1.1) |
| 6 | FAI16 | 0.86(0.58, 0.97) | 0.81(0.4, 0.99) | 234.73(2.89, 1395.87) | 11.39(0.04, 45) | 1.07(0.71, 1.48) | 0.83(0.41, 1.06) |
| 7 | VAI157 | 0.74(0.45, 0.93) | 0.88(0.54, 1) | 190.06(2.48, 996.4) | 5.33(0.03, 37.05) | 0.92(0.52, 1.36) | 0.9(0.56, 1.09) |
| 8 | CK18-M3084, 166 | 0.65(0.4, 0.84) | 0.93(0.75, 1) | 175.38(4.36, 1065.58) | 2.57(0.04, 19) | 0.81(0.48, 1.2) | 0.96(0.75, 1.15) |
| 9 | FGF2155 | 0.76(0.43, 0.95) | 0.81(0.42, 0.99) | 158.92(1.56, 604.62) | 5.13(0.03, 39) | 0.95(0.52, 1.38) | 0.84(0.42, 1.07) |
| 10 | PDFF13, 32, 144, 147, 155 | 0.91(0.83, 0.96) | 0.86(0.69, 0.96) | 97.36(18.12, 330.99) | 16.07(1.15, 41.05) | 1.14(0.95, 1.55) | 0.88(0.7, 1.05) |
| 11 | HSI157 | 0.59(0.26, 0.86) | 0.88(0.56, 1) | 85.1(1.22, 508.25) | 1.46(0.03, 11) | 0.73(0.32, 1.18) | 0.91(0.58, 1.11) |
| 12 | Liver Young′s modulus13 | 0.82(0.55, 0.96) | 0.8(0.48, 0.97) | 56.09(2.69, 282.84) | 6.23(0.03, 37) | 1.03(0.67, 1.42) | 0.82(0.5, 1.05) |
| 13 | CK18-M6584 | 0.9(0.7, 0.99 | 0.57(0.15, 0.94) | 53.03(1.15, 289.57) | 6.12(0.03, 37) | 1.12(0.82, 1.54) | 0.59(0.15, 0.97) |
| 14 | VTQ16 | 0.9(0.67, 0.98) | 0.6(0.21, 0.92) | 43.67(1.44, 233.66) | 6.19(0.03, 33) | 1.12(0.82, 1.55) | 0.62(0.21, 0.96) |
| 15 | MRI28, 179 | 0.83(0.67, 0.92) | 0.85(0.69, 0.94) | 40.39(7.92, 123.22) | 4.63(0.14, 31) | 1.03(0.79, 1.43) | 0.88(0.71, 1.04) |
| 16 | FLI157 | 0.71(0.41, 0.92) | 0.8(0.41, 0.98) | 32.67(1.22, 177.32) | 1.96(0.03, 19) | 0.89(0.5, 1.31) | 0.82(0.42, 1.04) |
| 17 | UGAP128 | 0.81(0.54, 0.96) | 0.7(0.33, 0.94) | 24.84(1.56, 121.26) | 2.82(0.03, 25) | 1.01(0.64, 1.43) | 0.72(0.34, 0.99) |
| 18 | UAP17, 167 | 0.78(0.56, 0.91) | 0.81(0.58, 0.94) | 24.33(3.46, 83.86) | 2.15(0.03, 17) | 0.97(0.66, 1.36) | 0.83(0.59, 1.02) |
| 19 | NFS157 | 0.62(0.3, 0.87) | 0.8(0.4, 0.98) | 21.37(0.79, 105.36) | 0.83(0.02, 5.4) | 0.77(0.35, 1.24) | 0.82(0.41, 1.05) |
| 20 | GGT166 | 0.72(0.4, 0.92) | 0.75(0.39, 0.95) | 20.45(0.93, 102.97) | 1.57(0.02, 11.67) | 0.9(0.47, 1.36) | 0.77(0.4, 1.01) |
| 21 | AST166 | 0.87(0.63, 0.98) | 0.54(0.2, 0.85) | 19.98(1.02, 100.73) | 2.76(0.03, 21) | 1.09(0.75, 1.52) | 0.55(0.2, 0.88) |
| 22 | TE14, 16, 46, 52, 54, 88, 97, 106, 115, 128, 135, 141, 148, 155 | 0.79(0.73, 0.84) | 0.8(0.73, 0.86) | 16.7(8.99, 28.13) | 0.93(0.12, 3) | 0.99(0.81, 1.35) | 0.82(0.74, 0.98) |
| 23 | ATI128 | 0.78(0.48, 0.94) | 0.64(0.28, 0.92) | 14.77(0.93, 67.32) | 1.47(0.02, 13) | 0.98(0.58, 1.4) | 0.66(0.29, 0.96) |
| 24 | CK-1833, 55 | 0.82(0.62, 0.94) | 0.62(0.33, 0.85) | 12.4(1.57, 49.3) | 1.19(0.03, 8.33) | 1.03(0.73, 1.45) | 0.63(0.33, 0.89) |
| 25 | CTL-S154 | 0.85(0.59, 0.97) | 0.49(0.19, 0.8) | 10.85(0.76, 49.28) | 1.39(0.02, 13) | 1.06(0.71, 1.48) | 0.5(0.2, 0.84) |
| 26 | Clinical-CT index154 | 0.85(0.6, 0.97) | 0.45(0.15, 0.77) | 9.31(0.63, 42.63) | 1.1(0.02, 11) | 1.06(0.7, 1.46) | 0.46(0.16, 0.81) |
| 27 | SteatoTest131 | 0.79(0.5, 0.95) | 0.51(0.18, 0.83) | 8.45(0.54, 40.74) | 0.88(0.02, 7) | 0.99(0.6, 1.42) | 0.52(0.18, 0.87) |

| **eTable 6. 4 NITs diagnostic for steatosis ≥S2 ANOVA model analysis results with references** | | | | | | | |
| --- | --- | --- | --- | --- | --- | --- | --- |
| No. | NITs | Sensitivity (95%CI) | Specificity (95%CI) | DOR (95%CI) | S (95%CI) | Relative Sensitivity (95%CI) | Relative Specificity (95%CI) |
| 1 | HRI133 | 0.86(0.63, 0.97) | 0.87(0.65, 0.98) | 127.23(7.69, 594.44) | 3.56(0.2, 7) | 1 | 1 |
| 2 | MRS136 | 0.79(0.49, 0.96) | 0.9(0.69, 0.99) | 116.52(5.21, 595.46) | 2.57(0.2, 7) | 0.93(0.56, 1.32) | 1.04(0.78, 1.4) |
| 3 | PDFF129, 132, 136, 138, 155 | 0.8(0.69, 0.87) | 0.87(0.79, 0.92) | 28.88(11.98, 56.75) | 1.11(0.2, 5) | 0.94(0.75, 1.29) | 1.01(0.85, 1.34) |
| 4 | TE107, 133, 162, 165 | 0.84(0.73, 0.91) | 0.64(0.48, 0.77) | 10.7(3.72, 22.69) | 0.43(0.14, 1) | 0.98(0.82, 1.32) | 0.74(0.54, 1) |

| **eTable 7. 40 NITs diagnostic for NAFL vs. NASH ANOVA model analysis results with references** | | | | | | | |
| --- | --- | --- | --- | --- | --- | --- | --- |
| No. | NITs | Sensitivity (95%CI) | Specificity (95%CI) | DOR (95%CI) | S (95%CI) | Relative Sensitivity (95%CI) | Relative Specificity (95%CI) |
| 1 | MRE112 | 0.89(0.68, 0.99) | 0.99(0.97, 1) | 4360974.03(210.74, 3589007.06) | 63.06(17, 79) | 1.01(0.74, 1.45) | 1.54(1.03, 3.34) |
| 2 | HsCRP22 | 0.63(0.35, 0.84) | 0.96(0.77, 1) | 942765.03(4.88, 154229.3) | 10.26(0.2, 47) | 0.71(0.38, 1.1) | 1.5(0.93, 3.21) |
| 3 | IL-1RA76 | 0.84(0.5, 0.98) | 0.93(0.62, 1) | 1234.67(10.55, 7459.82) | 29.77(0.68, 75) | 0.95(0.55, 1.41) | 1.44(0.79, 3.07) |
| 4 | mi-RNA 99a62 | 0.89(0.7, 0.98) | 0.93(0.77, 0.99) | 282.72(22.63, 1264.09) | 33.65(3.73, 73) | 1.01(0.75, 1.43) | 1.43(0.91, 3.12) |
| 5 | A1AT175 | 0.77(0.41, 0.96) | 0.76(0.28, 0.99) | 110.2(1.27, 513.69) | 7.94(0.02, 59) | 0.87(0.45, 1.29) | 1.19(0.38, 2.81) |
| 6 | PC1 | 0.9(0.63, 0.99) | 0.72(0.3, 0.96) | 109.72(3.48, 668.96) | 17.25(0.13, 65) | 1 | 1 |
| 7 | AC50 | 0.88(0.55, 1) | 0.48(0.11, 0.85) | 82.36(0.75, 326.64) | 5.47(0.02, 41) | 1(0.59, 1.47) | 0.75(0.15, 1.87) |
| 8 | FNI177 | 0.77(0.41, 0.97) | 0.82(0.46, 0.98) | 55.29(2.46, 292.94) | 9.02(0.06, 59) | 0.87(0.45, 1.31) | 1.28(0.59, 2.87) |
| 9 | SAN21 | 0.55(0.19, 0.86) | 0.9(0.59, 1) | 47.81(1.5, 289.4) | 3.11(0.03, 17) | 0.62(0.21, 1.07) | 1.39(0.76, 3.01) |
| 10 | NI-NASH-DS26 | 0.8(0.55, 0.94) | 0.83(0.59, 0.97) | 42.95(4.08, 182.45) | 8.14(0.24, 55) | 0.9(0.6, 1.32) | 1.29(0.71, 2.82) |
| 11 | C1345 | 0.74(0.38, 0.95) | 0.78(0.38, 0.97) | 28.55(1.63, 139.16) | 4.65(0.02, 29) | 0.84(0.42, 1.29) | 1.2(0.51, 2.75) |
| 12 | MR-MASH149 | 0.83(0.52, 0.97) | 0.68(0.27, 0.94) | 27.46(1.77, 125.68) | 6.21(0.03, 47) | 0.94(0.56, 1.36) | 1.06(0.35, 2.48) |
| 13 | mi-RNA 34a62 | 0.76(0.5, 0.93) | 0.82(0.57, 0.94) | 25.56(3.43, 92.92) | 4.43(0.13, 17.67) | 0.86(0.55, 1.26) | 1.27(0.72, 2.81) |
| 14 | ActiTest131 | 0.49(0.15, 0.86) | 0.86(0.52, 0.99) | 17.68(0.85, 90.34) | 1.6(0.02, 9.81) | 0.56(0.16, 1.05) | 1.33(0.66, 2.91) |
| 15 | C-DAG92 | 0.67(0.29, 0.92) | 0.76(0.36, 0.97) | 16.35(1.1, 74.44) | 2.33(0.02, 13) | 0.76(0.33, 1.2) | 1.18(0.49, 2.67) |
| 16 | RBP464 | 0.72(0.35, 0.95) | 0.68(0.26, 0.95) | 16.1(0.9, 83.78) | 2.77(0.02, 18.33) | 0.82(0.39, 1.24) | 1.06(0.34, 2.39) |
| 17 | FGF2133 | 0.82(0.56, 0.96) | 0.63(0.24, 0.88) | 14.22(1.25, 55.02) | 2.95(0.03, 16.33) | 0.92(0.6, 1.35) | 0.97(0.34, 2.22) |
| 18 | ELF109 | 0.68(0.29, 0.94) | 0.68(0.24, 0.95) | 12.49(0.58, 62.85) | 1.98(0.02, 12.61) | 0.77(0.33, 1.21) | 1.05(0.31, 2.47) |
| 19 | CK-1820, 26, 33 | 0.77(0.57, 0.91) | 0.72(0.47, 0.9) | 12.2(2.84, 38.19) | 2.16(0.07, 9.4) | 0.87(0.61, 1.28) | 1.12(0.59, 2.46) |
| 20 | LEARN139 | 0.84(0.52, 0.97) | 0.5(0.13, 0.88) | 11.98(0.83, 56.23) | 2.37(0.02, 17.67) | 0.94(0.57, 1.36) | 0.79(0.17, 2) |
| 21 | M2BPGi119 | 0.84(0.63, 0.96) | 0.54(0.26, 0.82) | 11.94(1.43, 48.03) | 2.33(0.02, 17) | 0.95(0.68, 1.38) | 0.85(0.34, 1.99) |
| 22 | GGT166 | 0.75(0.48, 0.93) | 0.69(0.33, 0.87) | 11.24(1.29, 40.64) | 1.98(0.02, 11) | 0.85(0.53, 1.26) | 1.07(0.45, 2.37) |
| 23 | NashTest124 | 0.39(0.1, 0.76) | 0.86(0.5, 0.99) | 10.97(0.54, 56.99) | 0.66(0.02, 4.6) | 0.44(0.11, 0.92) | 1.33(0.65, 2.87) |
| 24 | mi-RNA 12262 | 0.72(0.46, 0.91) | 0.71(0.43, 0.89) | 10.64(1.56, 37.81) | 1.49(0.02, 7.29) | 0.82(0.5, 1.22) | 1.11(0.55, 2.51) |
| 25 | AST166 | 0.75(0.48, 0.93) | 0.68(0.33, 0.86) | 10.53(1.26, 39.36) | 1.72(0.02, 9.67) | 0.85(0.51, 1.27) | 1.05(0.44, 2.36) |
| 26 | SWS50 | 0.58(0.2, 0.9) | 0.74(0.33, 0.96) | 10.36(0.53, 52.07) | 1.31(0.02, 8.21) | 0.65(0.22, 1.09) | 1.15(0.42, 2.6) |
| 27 | TE8, 26, 112, 133, 148 | 0.81(0.69, 0.9) | 0.66(0.49, 0.8) | 9.33(3.64, 19.94) | 1.37(0.16, 5) | 0.91(0.73, 1.29) | 1.02(0.59, 2.25) |
| 28 | FAST 8 | 0.8(0.59, 0.92) | 0.61(0.36, 0.81) | 8.58(1.62, 25.89) | 1.26(0.02, 6.43) | 0.9(0.63, 1.31) | 0.95(0.47, 2.17) |
| 29 | ALT62, 134, 166 | 0.66(0.45, 0.83) | 0.76(0.5, 0.9) | 8.25(1.8, 22.17) | 0.91(0.02, 3.86) | 0.75(0.48, 1.11) | 1.17(0.62, 2.58) |
| 30 | CK18-M6573, 84 | 0.75(0.55, 0.9) | 0.65(0.41, 0.85) | 7.79(1.68, 24.12) | 1.01(0.02, 5.29) | 0.84(0.59, 1.25) | 1.01(0.5, 2.21) |
| 31 | AFABP33 | 0.77(0.5, 0.94) | 0.56(0.19, 0.83) | 7.34(0.64, 26.85) | 0.98(0.02, 5.86) | 0.87(0.54, 1.27) | 0.87(0.25, 2) |
| 32 | BARD26 | 0.73(0.45, 0.91) | 0.62(0.33, 0.85) | 7.32(1.01, 27.38) | 1.01(0.02, 6.6) | 0.83(0.49, 1.25) | 0.97(0.43, 2.22) |
| 33 | TyG48 | 0.67(0.28, 0.93) | 0.59(0.18, 0.91) | 6.45(0.44, 29.33) | 0.94(0.01, 6.43) | 0.76(0.31, 1.21) | 0.92(0.23, 2.22) |
| 34 | ION93 | 0.68(0.3, 0.93) | 0.58(0.18, 0.9) | 6.02(0.45, 27.65) | 0.83(0.01, 5.86) | 0.77(0.34, 1.22) | 0.9(0.24, 2.23) |
| 35 | CK18-M3073, 84, 102, 166, 178 | 0.58(0.42, 0.73) | 0.78(0.63, 0.89) | 5.72(2.11, 13.06) | 0.4(0.03, 1.67) | 0.66(0.45, 0.99) | 1.21(0.73, 2.62) |
| 36 | APRI8, 26 | 0.64(0.43, 0.8) | 0.72(0.52, 0.87) | 5.66(1.52, 14.08) | 0.49(0.02, 2.11) | 0.72(0.47, 1.07) | 1.12(0.63, 2.53) |
| 37 | FIB48, 22, 112, 119 | 0.72(0.57, 0.84) | 0.61(0.44, 0.77) | 4.83(1.82, 10.46) | 0.34(0.02, 1.4) | 0.82(0.61, 1.2) | 0.96(0.54, 2.15) |
| 38 | HAALT scoring system112 | 0.62(0.34, 0.88) | 0.62(0.4, 0.85) | 4.21(0.65, 16.14) | 0.33(0.02, 2.34) | 0.7(0.38, 1.11) | 0.97(0.49, 2.18) |
| 39 | GP7325, 112 | 0.92(0.77, 0.98) | 0.2(0.06, 0.48) | 4.15(0.59, 14.43) | 0.6(0.03, 3.57) | 1.04(0.81, 1.49) | 0.32(0.08, 0.87) |
| 40 | NFS8, 26 | 0.62(0.44, 0.77) | 0.68(0.49, 0.83) | 4.09(1.3, 9.43) | 0.25(0.02, 1.11) | 0.7(0.47, 1.05) | 1.06(0.6, 2.37) |

| **eTable 8. 15 NITs diagnostic for NAFLD with fibrosis ANOVA model analysis results with references** | | | | | | | |
| --- | --- | --- | --- | --- | --- | --- | --- |
| No. | NITs | Sensitivity (95%CI) | Specificity (95%CI) | DOR (95%CI) | S (95%CI) | Relative Sensitivity (95%CI) | Relative Specificity (95%CI) |
| 1 | sH2a58 | 0.72(0.32, 0.95) | 0.72(0.25, 0.98) | 40.64(0.64, 244.34) | 9.01(0.08, 27) | 1.17(0.43, 2.88) | 1.38(0.36, 4.09) |
| 2 | IgA61 | 0.73(0.43, 0.95) | 0.73(0.26, 0.97) | 27.38(0.78, 157.05) | 8.92(0.08, 27) | 1.18(0.56, 2.88) | 1.39(0.39, 4.13) |
| 3 | sICAM-158 | 0.71(0.31, 0.94) | 0.67(0.2, 0.97) | 23.18(0.45, 152.53) | 6.41(0.05, 27) | 1.15(0.38, 2.8) | 1.29(0.29, 3.83) |
| 4 | AAR score19 | 0.7(0.28, 0.96) | 0.63(0.19, 0.96) | 18.24(0.33, 108.01) | 5.95(0.05, 25) | 1 | 1 |
| 5 | NIS79 | 0.63(0.31, 0.86) | 0.66(0.22, 0.96) | 10.13(0.34, 59.72) | 3.99(0.05, 23) | 1.01(0.42, 2.34) | 1.26(0.32, 3.75) |
| 6 | TE31, 49, 85 | 0.6(0.45, 0.77) | 0.81(0.55, 0.95) | 9.98(1.7, 32.59) | 4.28(0.2, 19) | 0.98(0.55, 2.31) | 1.55(0.73, 4.34) |
| 7 | ASMase67, 70 | 0.74(0.53, 0.91) | 0.67(0.33, 0.91) | 9.93(1.14, 36.86) | 5.79(0.09, 23) | 1.2(0.64, 2.85) | 1.27(0.45, 3.73) |
| 8 | Hui score85 | 0.6(0.33, 0.85) | 0.69(0.25, 0.97) | 9.37(0.38, 51.83) | 3.26(0.05, 21) | 0.97(0.43, 2.29) | 1.32(0.38, 3.9) |
| 9 | FIB431, 49, 61, 67, 85 | 0.68(0.55, 0.81) | 0.78(0.6, 0.88) | 9.16(2.81, 21.7) | 5.13(0.43, 19) | 1.1(0.63, 2.64) | 1.5(0.75, 4.12) |
| 10 | Forns index85 | 0.63(0.36, 0.87) | 0.61(0.17, 0.94) | 6.35(0.3, 33.96) | 2.67(0.05, 19) | 1.02(0.47, 2.41) | 1.16(0.26, 3.5) |
| 11 | APRI19, 49, 61, 79, 94 | 0.54(0.37, 0.67) | 0.73(0.53, 0.87) | 3.89(1.15, 9.48) | 1.16(0.08, 5.67) | 0.86(0.48, 1.84) | 1.39(0.7, 3.82) |
| 12 | BARD19, 94 | 0.84(0.54, 0.95) | 0.29(0.08, 0.65) | 3.85(0.28, 16.3) | 1.89(0.06, 11) | 1.34(0.73, 2.89) | 0.55(0.12, 1.69) |
| 13 | Fasting C-peptide31 | 0.64(0.34, 0.9) | 0.42(0.07, 0.83) | 2.9(0.1, 14.45) | 1.14(0.04, 11) | 1.04(0.43, 2.57) | 0.82(0.1, 2.82) |
| 14 | BAAT94 | 0.04(0, 0.28) | 0.73(0.23, 0.99) | 0.44(0, 2.89) | 0.44(0.04, 3) | 0.06(0, 0.49) | 1.39(0.36, 4.06) |
| 15 | NFS85, 94 | 0.04(0, 0.13) | 0.58(0.25, 0.86) | 0.09(0, 0.42) | 0.12(0.04, 0.6) | 0.07(0.01, 0.26) | 1.11(0.36, 3.29) |

| **eTable 9. 40 NITs diagnostic for NAFLD ≥F2 ANOVA model analysis results with references** | | | | | | | |
| --- | --- | --- | --- | --- | --- | --- | --- |
| No. | NITs | Sensitivity (95%CI) | Specificity (95%CI) | DOR (95%CI) | S (95%CI) | Relative Sensitivity (95%CI) | Relative Specificity (95%CI) |
| 1 | HRI133 | 0.84(0.55, 0.98) | 0.83(0.51, 0.98) | 80.94(6.46, 391.41) | 39.24(0.71, 77) | 1.04(0.68, 1.24) | 1(0.61, 1.22) |
| 2 | HSI82 | 0.6(0.37, 0.8) | 0.97(0.92, 0.99) | 63.75(13.13, 196.85) | 21.16(1, 61) | 0.74(0.46, 1) | 1.17(1.08, 1.26) |
| 3 | SHG B-index169 | 0.8(0.5, 0.96) | 0.82(0.51, 0.97) | 40.57(4.84, 160.84) | 27.2(0.33, 73) | 0.98(0.61, 1.21) | 0.99(0.61, 1.21) |
| 4 | FLI56 | 0.77(0.6, 0.89) | 0.86(0.7, 0.96) | 30.75(6.37, 93.26) | 26.37(0.76, 69) | 0.94(0.75, 1.11) | 1.04(0.85, 1.18) |
| 5 | Ali2021145 | 0.81(0.54, 0.96) | 0.79(0.48, 0.95) | 28.01(4.85, 89.58) | 21.35(0.33, 69) | 0.99(0.66, 1.2) | 0.95(0.58, 1.18) |
| 6 | LRM98 | 0.81(0.65, 0.91) | 0.83(0.7, 0.91) | 25.45(6.99, 64.38) | 23.81(1.13, 69) | 0.99(0.8, 1.14) | 1(0.83, 1.13) |
| 7 | MRE6, 7, 10, 56, 74, 81, 113, 152, 155 | 0.81(0.76, 0.86) | 0.83(0.77, 0.88) | 22.36(13.17, 36.15) | 20.61(3.89, 61) | 1 | 1 |
| 8 | 2D-SWE15, 74 | 0.91(0.82, 0.97) | 0.61(0.38, 0.81) | 21.72(5.59, 61.32) | 13.41(0.71, 53) | 1.12(0.99, 1.23) | 0.74(0.47, 1) |
| 9 | FibRO-3113 | 0.81(0.62, 0.93) | 0.77(0.57, 0.9) | 19.45(4.79, 54.81) | 15.02(0.33, 65) | 0.99(0.76, 1.17) | 0.93(0.67, 1.12) |
| 10 | ElastPQ143 | 0.68(0.46, 0.85) | 0.83(0.64, 0.94) | 14.13(2.95, 41.85) | 8.44(0.07, 53) | 0.84(0.57, 1.06) | 1(0.78, 1.16) |
| 11 | NIS44 | 0.8(0.67, 0.89) | 0.73(0.58, 0.86) | 13.55(4.35, 32.69) | 7.83(0.26, 51) | 0.98(0.82, 1.12) | 0.89(0.7, 1.06) |
| 12 | FIB860 | 0.86(0.72, 0.95) | 0.58(0.39, 0.77) | 11.41(2.71, 33.59) | 5.05(0.1, 33) | 1.06(0.88, 1.2) | 0.7(0.47, 0.94) |
| 13 | PDFF91 | 0.86(0.58, 0.98) | 0.44(0.14, 0.78) | 9.9(1.05, 41.87) | 3.63(0.02, 19) | 1.06(0.72, 1.25) | 0.53(0.17, 0.95) |
| 14 | ARFI34, 37, 79, 153, 156, 159, 168, 174 | 0.67(0.54, 0.77) | 0.81(0.72, 0.89) | 9.28(4.83, 15.81) | 2.8(0.24, 11.67) | 0.82(0.66, 0.97) | 0.98(0.85, 1.11) |
| 15 | Hepascore104 | 0.6(0.41, 0.77) | 0.82(0.67, 0.92) | 8.76(2.4, 23.65) | 2.88(0.03, 19) | 0.74(0.5, 0.95) | 0.99(0.81, 1.14) |
| 16 | CA index81 | 0.63(0.44, 0.79) | 0.8(0.65, 0.91) | 8.67(2.37, 22.95) | 3.05(0.03, 17.67) | 0.77(0.54, 0.99) | 0.97(0.79, 1.12) |
| 17 | TE6, 8, 17, 30, 34, 44, 47, 51, 52, 56, 74, 81, 110, 143, 155, 170 | 0.72(0.67, 0.76) | 0.76(0.71, 0.8) | 8.29(6.01, 11.18) | 1.84(0.53, 4.43) | 0.88(0.81, 0.96) | 0.92(0.85, 1) |
| 18 | ELF44, 89, 160, 173 | 0.68(0.57, 0.78) | 0.78(0.68, 0.86) | 8.19(3.99, 15.21) | 2.18(0.15, 9) | 0.84(0.7, 0.98) | 0.94(0.81, 1.07) |
| 19 | PROC344, 108, 111, 114, 117, 120 | 0.62(0.51, 0.71) | 0.8(0.72, 0.87) | 7.04(3.92, 11.69) | 1.29(0.11, 5) | 0.76(0.62, 0.89) | 0.97(0.85, 1.09) |
| 20 | P4NP 7S81 | 0.7(0.51, 0.85) | 0.7(0.53, 0.84) | 6.85(1.92, 18.34) | 1.9(0.02, 11.67) | 0.86(0.63, 1.05) | 0.84(0.63, 1.03) |
| 21 | FIB46, 8, 12, 44, 60, 80, 81, 98, 99, 104, 113, 158, 160, 164 | 0.67(0.61, 0.72) | 0.77(0.72, 0.81) | 6.73(4.88, 9.17) | 1.05(0.29, 2.56) | 0.82(0.74, 0.9) | 0.93(0.85, 1.01) |
| 22 | Hepamet99 | 0.74(0.57, 0.87) | 0.65(0.47, 0.8) | 6.53(1.97, 16.97) | 1.6(0.02, 9.67) | 0.91(0.69, 1.09) | 0.78(0.57, 0.98) |
| 23 | M2BPGi80 | 0.73(0.56, 0.88) | 0.64(0.46, 0.8) | 6.24(1.75, 16.84) | 1.44(0.02, 8.6) | 0.9(0.67, 1.1) | 0.77(0.55, 0.97) |
| 24 | Marta202090 | 0.64(0.31, 0.89) | 0.68(0.34, 0.92) | 5.97(0.99, 19.31) | 1.6(0.02, 11) | 0.78(0.38, 1.11) | 0.83(0.41, 1.13) |
| 25 | FibroTest104, 121 | 0.7(0.55, 0.83) | 0.69(0.54, 0.82) | 5.94(2.3, 13.05) | 1.05(0.03, 5) | 0.86(0.67, 1.04) | 0.83(0.64, 1) |
| 26 | RPR5 | 0.49(0.17, 0.81) | 0.79(0.45, 0.96) | 5.9(0.86, 20.42) | 1.2(0.02, 8.33) | 0.61(0.21, 1.01) | 0.95(0.54, 1.19) |
| 27 | CTL-S164 | 0.66(0.49, 0.8) | 0.71(0.54, 0.84) | 5.64(1.78, 13.69) | 1.02(0.02, 5.45) | 0.82(0.6, 1) | 0.85(0.65, 1.03) |
| 28 | NFS8, 47, 60, 80, 81, 98, 99, 164 | 0.64(0.56, 0.71) | 0.75(0.68, 0.81) | 5.5(3.61, 8.14) | 0.58(0.1, 1.77) | 0.79(0.69, 0.89) | 0.9(0.81, 1) |
| 29 | APRI8, 12, 80, 81, 82, 98, 104, 173 | 0.7(0.63, 0.77) | 0.68(0.6, 0.74) | 5.18(3.3, 7.74) | 0.52(0.1, 1.53) | 0.87(0.76, 0.97) | 0.82(0.72, 0.92) |
| 30 | p-SWE57, 110 | 0.61(0.35, 0.83) | 0.7(0.48, 0.87) | 5.1(0.99, 15.46) | 1.19(0.02, 7.67) | 0.75(0.43, 1.03) | 0.85(0.58, 1.07) |
| 31 | MASEF27 | 0.72(0.51, 0.87) | 0.6(0.38, 0.8) | 4.92(1.36, 12.71) | 0.83(0.02, 4.72) | 0.88(0.62, 1.09) | 0.73(0.46, 0.98) |
| 32 | Forns index12 | 0.63(0.42, 0.81) | 0.69(0.51, 0.83) | 4.61(1.25, 12.84) | 0.68(0.02, 4.11) | 0.77(0.51, 1) | 0.83(0.61, 1.02) |
| 33 | AAR score81 | 0.55(0.37, 0.73) | 0.75(0.58, 0.88) | 4.6(1.31, 11.84) | 0.59(0.02, 3.67) | 0.67(0.45, 0.9) | 0.91(0.71, 1.07) |
| 34 | MEFIB86 | 0.36(0.17, 0.59) | 0.85(0.68, 0.95) | 4.44(0.9, 13.62) | 0.37(0.02, 2.27) | 0.45(0.21, 0.73) | 1.03(0.81, 1.19) |
| 35 | FAST8, 27, 86 | 0.6(0.45, 0.73) | 0.73(0.6, 0.83) | 4.35(2.05, 8.5) | 0.37(0.02, 1.73) | 0.74(0.55, 0.91) | 0.88(0.73, 1.02) |
| 36 | Clinical-CT index164 | 0.57(0.38, 0.74) | 0.72(0.55, 0.85) | 4.09(1.25, 10.11) | 0.42(0.02, 2.56) | 0.7(0.48, 0.91) | 0.87(0.67, 1.04) |
| 37 | BARD9, 81, 104 | 0.6(0.47, 0.73) | 0.62(0.48, 0.74) | 2.68(1.13, 5.52) | 0.1(0.02, 0.45) | 0.74(0.57, 0.91) | 0.75(0.58, 0.91) |
| 38 | FIB6161 | 0.82(0.55, 0.96) | 0.22(0.05, 0.51) | 1.67(0.35, 5.06) | 0.49(0.02, 3) | 1.01(0.67, 1.21) | 0.27(0.06, 0.63) |
| 39 | ALT134 | 0.65(0.32, 0.91) | 0.28(0.07, 0.61) | 0.93(0.16, 3.18) | 0.11(0.01, 0.71) | 0.8(0.39, 1.13) | 0.34(0.09, 0.74) |
| 40 | M2BP160 | 0.8(0.63, 0.91) | 0.05(0.02, 0.12) | 0.27(0.07, 0.76) | 0.08(0.02, 0.33) | 0.99(0.78, 1.14) | 0.07(0.03, 0.15) |

| **eTable 10. 64 NITs diagnostic for Advanced fibrosis (≥F3) ANOVA model analysis results with references** | | | | | | | |
| --- | --- | --- | --- | --- | --- | --- | --- |
| No. | NITs | Sensitivity (95%CI) | Specificity (95%CI) | DOR (95%CI) | S (95%CI) | Relative Sensitivity (95%CI) | Relative Specificity (95%CI) |
| 1 | CK-1823 | 0.95(0.65, 1) | 0.53(0.19, 0.85) | 102654.16(1.6, 134059.8) | 21.95(0.1, 97) | 1.11(0.75, 1.29) | 0.61(0.21, 0.98) |
| 2 | SHG B-index169 | 0.81(0.44, 0.98) | 0.95(0.77, 1) | 1149.9(11.35, 5983.64) | 73.13(2.43, 125) | 0.94(0.51, 1.19) | 1.09(0.89, 1.24) |
| 3 | LFS78 | 0.83(0.41, 0.99) | 0.89(0.58, 1) | 793.48(4.17, 5316.76) | 57.77(0.45, 125) | 0.97(0.47, 1.23) | 1.02(0.66, 1.21) |
| 4 | LPR42 | 0.89(0.61, 1) | 0.78(0.49, 0.95) | 239.87(3.96, 1371.41) | 40.27(0.41, 117) | 1.04(0.7, 1.24) | 0.9(0.56, 1.12) |
| 5 | FM127 | 0.87(0.66, 0.98) | 0.8(0.5, 0.96) | 78.67(4.6, 382.09) | 34.26(0.58, 117) | 1.02(0.76, 1.21) | 0.92(0.57, 1.13) |
| 6 | HSI82 | 0.72(0.39, 0.94) | 0.89(0.66, 0.98) | 61.12(3.53, 306.22) | 26.31(0.33, 113) | 0.84(0.45, 1.13) | 1.02(0.75, 1.19) |
| 7 | FLI56 | 0.83(0.57, 0.97) | 0.79(0.47, 0.96) | 52.18(3.43, 247.93) | 24.61(0.3, 113) | 0.97(0.67, 1.18) | 0.91(0.55, 1.13) |
| 8 | MRE2, 7, 10, 56, 74, 152, 155 | 0.86(0.76, 0.93) | 0.88(0.79, 0.94) | 51.11(18.71, 115.19) | 31.23(5.15, 105) | 1(1, 1) | 1(1, 1) |
| 9 | 10 metabolitites163 | 0.73(0.33, 0.97) | 0.84(0.59, 0.97) | 50.89(1.88, 271.77) | 20.12(0.12, 111) | 0.85(0.39, 1.17) | 0.96(0.65, 1.16) |
| 10 | Hepascore18, 35, 104 | 0.82(0.67, 0.92) | 0.88(0.75, 0.95) | 47.17(10.81, 141.89) | 26.76(2.52, 107) | 0.96(0.77, 1.13) | 1.01(0.84, 1.15) |
| 11 | PLT42 | 0.82(0.49, 0.98) | 0.64(0.32, 0.89) | 28.86(1.16, 159.52) | 9.68(0.06, 85.05) | 0.96(0.56, 1.2) | 0.74(0.37, 1.05) |
| 12 | HA87 | 0.87(0.62, 0.98) | 0.6(0.27, 0.88) | 28.59(1.61, 141.33) | 10.11(0.09, 77) | 1.02(0.7, 1.22) | 0.69(0.31, 1.02) |
| 13 | NFI59 | 0.8(0.51, 0.96) | 0.68(0.34, 0.92) | 20.92(1.26, 96.99) | 8.71(0.06, 81) | 0.94(0.59, 1.17) | 0.78(0.38, 1.07) |
| 14 | RPR5 | 0.7(0.3, 0.95) | 0.75(0.41, 0.95) | 20.45(1.04, 100.87) | 8.64(0.04, 87) | 0.82(0.35, 1.14) | 0.86(0.46, 1.13) |
| 15 | P4NP 7S24, 42, 87 | 0.72(0.53, 0.87) | 0.85(0.71, 0.94) | 19.85(4.65, 56.55) | 8.53(0.55, 35) | 0.84(0.6, 1.06) | 0.97(0.8, 1.12) |
| 16 | NAFLD-FM137 | 0.66(0.35, 0.9) | 0.81(0.53, 0.96) | 19.52(1.53, 86.03) | 8.53(0.08, 81.05) | 0.78(0.41, 1.07) | 0.93(0.6, 1.14) |
| 17 | Agile 3+ 95, 146 | 0.79(0.58, 0.93) | 0.77(0.56, 0.92) | 19.47(3.37, 64.51) | 8.44(0.3, 69) | 0.92(0.67, 1.13) | 0.88(0.63, 1.09) |
| 18 | S Index75 | 0.7(0.41, 0.91) | 0.78(0.49, 0.95) | 18.47(1.53, 82.15) | 7.99(0.09, 79.05) | 0.82(0.48, 1.11) | 0.89(0.55, 1.12) |
| 19 | ElastPQ143 | 0.77(0.45, 0.95) | 0.69(0.35, 0.92) | 17.93(1.18, 81.86) | 7.54(0.06, 79) | 0.9(0.52, 1.16) | 0.79(0.4, 1.08) |
| 20 | TE8, 17, 18, 24, 30, 34, 35, 36, 42, 51, 52, 56, 57, 65, 74, 95, 103, 110, 125, 127, 142, 143, 146, 155 | 0.84(0.79, 0.87) | 0.77(0.71, 0.82) | 17.58(11.48, 25.71) | 5.77(2.05, 14.6) | 0.98(0.89, 1.11) | 0.88(0.79, 0.99) |
| 21 | ARFI34, 37, 82, 140 | 0.68(0.47, 0.85) | 0.81(0.64, 0.93) | 12.79(2.93, 36.44) | 4.25(0.23, 19) | 0.8(0.54, 1.02) | 0.93(0.73, 1.11) |
| 22 | ADAPT103 | 0.73(0.41, 0.93) | 0.68(0.35, 0.92) | 12.56(0.92, 60) | 4.69(0.04, 30.33) | 0.86(0.48, 1.12) | 0.78(0.39, 1.07) |
| 23 | Autotaxin87 | 0.48(0.17, 0.8) | 0.86(0.61, 0.97) | 12.53(0.89, 55.27) | 4.48(0.03, 31) | 0.57(0.2, 0.94) | 0.98(0.69, 1.16) |
| 24 | PRO-C6103 | 0.72(0.4, 0.92) | 0.69(0.37, 0.92) | 12.42(1, 55.72) | 4.67(0.05, 30.33) | 0.85(0.46, 1.11) | 0.79(0.42, 1.07) |
| 25 | PRO-C4103 | 0.41(0.13, 0.74) | 0.87(0.63, 0.98) | 11.29(0.73, 52.16) | 3.48(0.02, 23) | 0.48(0.15, 0.87) | 1(0.72, 1.18) |
| 26 | FIBC-3 103 | 0.6(0.26, 0.87) | 0.77(0.47, 0.96) | 11.2(0.79, 54.02) | 4.1(0.03, 28.33) | 0.71(0.29, 1.03) | 0.88(0.52, 1.12) |
| 27 | MACK-3103 | 0.7(0.37, 0.91) | 0.69(0.35, 0.93) | 11.08(0.78, 50.83) | 3.99(0.03, 27) | 0.82(0.43, 1.1) | 0.79(0.4, 1.08) |
| 28 | SMPA15 | 0.7(0.36, 0.93) | 0.67(0.33, 0.92) | 11(0.78, 51.3) | 3.9(0.03, 27.03) | 0.82(0.43, 1.12) | 0.77(0.37, 1.07) |
| 29 | Caussy 2018163 | 0.73(0.34, 0.97) | 0.56(0.22, 0.86) | 10.2(0.45, 51.52) | 2.97(0.01, 23.67) | 0.86(0.4, 1.17) | 0.64(0.25, 0.99) |
| 30 | CAO2013103 | 0.55(0.22, 0.83) | 0.79(0.5, 0.96) | 10.04(0.75, 48.71) | 3.39(0.03, 23.67) | 0.64(0.26, 1) | 0.91(0.56, 1.14) |
| 31 | M2BPGi38 | 0.82(0.54, 0.96) | 0.5(0.19, 0.81) | 9.42(0.72, 44.14) | 2.91(0.03, 23) | 0.95(0.62, 1.18) | 0.58(0.22, 0.94) |
| 32 | FibroTest35, 104 | 0.67(0.44, 0.84) | 0.76(0.56, 0.91) | 9.34(1.78, 28.39) | 2.64(0.11, 12.6) | 0.78(0.51, 1.01) | 0.88(0.63, 1.07) |
| 33 | CK18-M30103 | 0.57(0.24, 0.85) | 0.76(0.44, 0.95) | 9.29(0.65, 39.99) | 2.91(0.02, 19.02) | 0.67(0.29, 1.01) | 0.87(0.5, 1.11) |
| 34 | FAST8 | 0.57(0.25, 0.85) | 0.77(0.47, 0.95) | 9.2(0.72, 40.25) | 3.04(0.02, 21.67) | 0.66(0.28, 1.01) | 0.89(0.53, 1.11) |
| 35 | SWE15, 30, 40, 57, 74, 110, 130 | 0.73(0.6, 0.84) | 0.73(0.61, 0.84) | 8.65(3.51, 17.91) | 1.88(0.31, 6.11) | 0.86(0.69, 1.03) | 0.84(0.68, 1) |
| 36 | BAAT137 | 0.88(0.64, 0.99) | 0.31(0.08, 0.64) | 8.29(0.44, 42.61) | 1.72(0.02, 13) | 1.03(0.75, 1.23) | 0.35(0.09, 0.73) |
| 37 | FibroMeter NAFLD Score75, 142 | 0.65(0.41, 0.84) | 0.75(0.52, 0.91) | 8.11(1.47, 26.98) | 2.2(0.07, 11.29) | 0.76(0.47, 1) | 0.86(0.58, 1.07) |
| 38 | THE118 | 0.79(0.48, 0.96) | 0.48(0.17, 0.81) | 8(0.46, 37.92) | 2.33(0.02, 15.67) | 0.93(0.56, 1.17) | 0.55(0.19, 0.93) |
| 39 | ELF38, 53, 89 | 0.77(0.58, 0.9) | 0.65(0.44, 0.82) | 7.84(1.98, 20.72) | 1.64(0.12, 7.29) | 0.9(0.67, 1.1) | 0.74(0.5, 0.96) |
| 40 | Fibrometer V2G35, 53 | 0.68(0.45, 0.86) | 0.7(0.45, 0.88) | 7.08(1.35, 22.56) | 1.57(0.06, 8.11) | 0.8(0.52, 1.03) | 0.8(0.51, 1.03) |
| 41 | IgA158 | 0.7(0.36, 0.93) | 0.59(0.25, 0.87) | 6.9(0.53, 30.58) | 2.04(0.01, 12.72) | 0.82(0.42, 1.11) | 0.67(0.29, 1.01) |
| 42 | NAFLD score118 | 0.62(0.27, 0.9) | 0.66(0.32, 0.92) | 6.89(0.47, 31.02) | 2.14(0.01, 13.81) | 0.73(0.32, 1.07) | 0.76(0.36, 1.06) |
| 43 | aMAP146 | 0.41(0.13, 0.74) | 0.83(0.58, 0.97) | 6.81(0.46, 29.59) | 1.84(0.01, 12.61) | 0.48(0.15, 0.88) | 0.95(0.66, 1.16) |
| 44 | BAAAP158 | 0.52(0.2, 0.83) | 0.75(0.42, 0.94) | 6.42(0.49, 27.45) | 1.88(0.01, 12.34) | 0.61(0.24, 0.99) | 0.86(0.47, 1.1) |
| 45 | Hui score75 | 0.4(0.14, 0.72) | 0.82(0.55, 0.97) | 6.19(0.49, 26.8) | 1.6(0.01, 10.34) | 0.47(0.16, 0.86) | 0.94(0.62, 1.14) |
| 46 | PRO-C3103, 108, 111, 114, 117, 120, 123, 126 | 0.68(0.55, 0.8) | 0.72(0.6, 0.82) | 6.09(2.81, 11.94) | 1.03(0.19, 3.13) | 0.8(0.63, 0.97) | 0.82(0.67, 0.97) |
| 47 | AP index69 | 0.49(0.2, 0.79) | 0.77(0.49, 0.95) | 6.06(0.48, 25.97) | 1.57(0.01, 11) | 0.57(0.23, 0.93) | 0.88(0.55, 1.11) |
| 48 | FIB48, 9, 11, 18, 35, 38, 39, 42, 59, 69, 72, 75, 77, 87, 95, 96, 101, 104, 105, 118, 122, 125, 127, 137, 140, 151, 163, 164, 172, 180 | 0.61(0.55, 0.67) | 0.79(0.75, 0.83) | 6.04(4.31, 8.17) | 1.02(0.4, 2.16) | 0.72(0.62, 0.83) | 0.9(0.82, 1.01) |
| 49 | NFS2, 8, 9, 11, 18, 35, 36, 42, 59, 69, 72, 77, 96, 101, 105, 125, 127, 137, 140, 142, 151, 158, 163, 164, 180 | 0.64(0.58, 0.7) | 0.76(0.71, 0.81) | 5.83(4.02, 8.23) | 0.95(0.35, 2.05) | 0.75(0.65, 0.87) | 0.87(0.79, 0.98) |
| 50 | N score69 | 0.62(0.3, 0.87) | 0.62(0.31, 0.88) | 4.87(0.42, 22.13) | 1.1(0.01, 6.82) | 0.72(0.35, 1.05) | 0.71(0.35, 1.03) |
| 51 | NIKEI71 | 0.44(0.15, 0.78) | 0.75(0.43, 0.94) | 4.86(0.34, 23.68) | 1.23(0.01, 8.72) | 0.52(0.18, 0.91) | 0.86(0.49, 1.11) |
| 52 | APRI8, 11, 12, 18, 35, 42, 59, 69, 71, 72, 75, 87, 96, 101, 104, 105, 118, 122, 125, 137, 140, 151, 164 | 0.58(0.51, 0.65) | 0.77(0.72, 0.81) | 4.71(3.23, 6.69) | 0.63(0.22, 1.4) | 0.68(0.58, 0.8) | 0.88(0.79, 0.99) |
| 53 | PDFF91 | 0.6(0.21, 0.93) | 0.57(0.21, 0.88) | 4.63(0.24, 22.46) | 1.29(0.01, 8.33) | 0.7(0.24, 1.1) | 0.65(0.23, 1.03) |
| 54 | NAFIC42 | 0.51(0.19, 0.83) | 0.69(0.37, 0.91) | 4.45(0.33, 20.57) | 1.02(0.01, 6.6) | 0.59(0.23, 0.98) | 0.79(0.42, 1.07) |
| 55 | Prothrombin-INR11 | 0.65(0.26, 0.94) | 0.48(0.16, 0.81) | 4.37(0.19, 22.56) | 1.05(0.01, 7.67) | 0.77(0.3, 1.13) | 0.55(0.19, 0.93) |
| 56 | BARD35, 59, 63, 69, 71, 72, 75, 96, 101, 104, 122, 125, 137, 140, 172 | 0.65(0.57, 0.73) | 0.66(0.59, 0.73) | 3.86(2.32, 5.94) | 0.43(0.13, 1) | 0.77(0.65, 0.9) | 0.76(0.65, 0.87) |
| 57 | FIB6161 | 0.79(0.46, 0.96) | 0.31(0.07, 0.67) | 3.26(0.22, 15.46) | 0.61(0.01, 3.67) | 0.92(0.54, 1.17) | 0.35(0.08, 0.78) |
| 58 | Albumin11 | 0.65(0.25, 0.95) | 0.37(0.1, 0.71) | 2.85(0.11, 17.2) | 0.62(0.01, 4.07) | 0.76(0.29, 1.13) | 0.43(0.12, 0.82) |
| 59 | AAR score9, 11, 42, 69, 72, 96, 101, 125, 137, 140, 151, 164 | 0.54(0.45, 0.64) | 0.69(0.6, 0.77) | 2.75(1.52, 4.57) | 0.24(0.06, 0.62) | 0.64(0.51, 0.78) | 0.79(0.67, 0.92) |
| 60 | CK18-M65103 | 0.41(0.13, 0.74) | 0.68(0.36, 0.91) | 2.64(0.21, 11.79) | 0.38(0.01, 2.64) | 0.48(0.15, 0.86) | 0.78(0.4, 1.06) |
| 61 | GUCI index11, 71 | 0.54(0.27, 0.79) | 0.59(0.34, 0.82) | 2.41(0.37, 8.02) | 0.28(0.01, 1.53) | 0.63(0.31, 0.94) | 0.68(0.38, 0.95) |
| 62 | KING score71 | 0.35(0.09, 0.68) | 0.7(0.36, 0.93) | 2.34(0.16, 11.14) | 0.36(0.01, 2.58) | 0.41(0.1, 0.79) | 0.81(0.41, 1.08) |
| 63 | Forns index71, 75 | 0.56(0.32, 0.78) | 0.44(0.22, 0.7) | 1.32(0.24, 4.23) | 0.11(0.01, 0.48) | 0.66(0.37, 0.93) | 0.51(0.25, 0.8) |
| 64 | Lok index71 | 0.32(0.08, 0.66) | 0.31(0.07, 0.64) | 0.3(0.02, 1.33) | 0.02(0.01, 0.07) | 0.38(0.09, 0.78) | 0.35(0.08, 0.73) |

| **eTable 11. 14 NITs diagnostic for High-risk NASH (NAS≥4, ≥F2) ANOVA model analysis results with references** | | | | | | | |
| --- | --- | --- | --- | --- | --- | --- | --- |
| No. | NITs | Sensitivity (95%CI) | Specificity (95%CI) | DOR (95%CI) | S (95%CI) | Relative Sensitivity (95%CI) | Relative Specificity (95%CI) |
| 1 | CK-1823 | 0.88(0.52, 1) | 0.37(0.07, 0.76) | 39.46(0.48, 267.09) | 2.78(0.05, 17) | 1.28(0.64, 2.62) | 0.67(0.11, 2.07) |
| 2 | ELF100 | 0.99(0.96, 1) | 0.07(0.01, 0.2) | 34.64(0.83, 181.08) | 1.03(0.33, 3) | 1.43(1.01, 2.94) | 0.13(0.02, 0.51) |
| 3 | C-DAG92 | 0.71(0.32, 0.96) | 0.8(0.43, 0.97) | 29.34(1.59, 144.73) | 8.26(0.09, 23) | 1.03(0.39, 2.32) | 1.46(0.62, 3.67) |
| 4 | RTE43 | 0.76(0.34, 0.97) | 0.63(0.22, 0.93) | 18.1(0.7, 96.33) | 5.21(0.05, 21) | 1 | 1 |
| 5 | FNI29 | 0.66(0.44, 0.82) | 0.85(0.61, 0.96) | 17.36(2.48, 59.67) | 6.53(0.2, 17) | 0.96(0.52, 2.04) | 1.55(0.78, 3.81) |
| 6 | MRE83 | 0.7(0.28, 0.95) | 0.66(0.25, 0.93) | 11.27(0.64, 53.29) | 3.76(0.05, 19) | 1.01(0.35, 2.32) | 1.21(0.38, 3.28) |
| 7 | MACK-366 | 0.69(0.51, 0.86) | 0.75(0.5, 0.93) | 10.63(1.82, 38.35) | 4.47(0.08, 17) | 1(0.58, 2.09) | 1.38(0.65, 3.51) |
| 8 | MEFIB86 | 0.8(0.62, 0.9) | 0.6(0.3, 0.85) | 8.34(1.47, 27.15) | 3.83(0.09, 17) | 1.15(0.71, 2.43) | 1.1(0.42, 2.95) |
| 9 | NIS100 | 0.79(0.64, 0.9) | 0.61(0.32, 0.83) | 7.9(1.62, 23.06) | 3.64(0.11, 15) | 1.14(0.7, 2.39) | 1.13(0.45, 2.99) |
| 10 | TE8, 100 | 0.86(0.74, 0.94) | 0.45(0.25, 0.64) | 6.36(1.77, 16.52) | 1.8(0.14, 9) | 1.25(0.82, 2.59) | 0.83(0.33, 2.21) |
| 11 | FAST8, 41, 66, 68, 86, 116 | 0.63(0.51, 0.74) | 0.72(0.6, 0.81) | 4.67(2.27, 8.35) | 0.93(0.08, 5) | 0.92(0.56, 1.93) | 1.32(0.71, 3.3) |
| 12 | APRI8, 100 | 0.6(0.45, 0.74) | 0.69(0.48, 0.83) | 3.86(1.27, 9) | 0.52(0.06, 3) | 0.87(0.5, 1.89) | 1.26(0.62, 3.21) |
| 13 | FIB48, 29, 41, 100 | 0.62(0.48, 0.74) | 0.68(0.52, 0.8) | 3.78(1.57, 7.51) | 0.5(0.07, 2.33) | 0.89(0.53, 1.9) | 1.25(0.64, 3.13) |
| 14 | NFS8, 41, 100 | 0.7(0.56, 0.83) | 0.52(0.32, 0.69) | 2.93(0.97, 6.55) | 0.33(0.06, 1.67) | 1.01(0.62, 2.16) | 0.97(0.44, 2.55) |

**Reference**

1. Fang DG, Xiao QH, Yang L, Zhang JJ, Cao K, Yi LN. Serum Lipomics Analysis and Diagnostic Value of Type 2 Diabetes Patients with Nonalcoholic Steatohepatitis. Journal of Modern Laboratory Medicine. 2023;38(3):159-64.

2. Cui J, Ang B, Haufe W, Hernandez C, Verna EC, Sirlin CB, et al. Comparative diagnostic accuracy of magnetic resonance elastography vs. eight clinical prediction rules for non-invasive diagnosis of advanced fibrosis in biopsy-proven non-alcoholic fatty liver disease: A prospective study. Alimentary Pharmacology and Therapeutics. 2015;41(12):1271-80.

3. Zhao Y, Zhang C, Xu S, Zhang H, Wei S, Huang P, et al. Quantitative evaluation of hepatic steatosis using novel ultrasound technology normalized local variance (NLV) and its standard deviation with different ROIs in patients with metabolic-associated fatty liver disease: a pilot study. Abdom Radiol (NY). 2022;47(2):693-703.

4. Cao DR, Xiong ML, Xing Z, Wang S. The Comparative Study of the Accuracy of MR and CT for the Quantitative Estimation of Hepatic Steatosis. Journal of Clinical Radiology. 2012;31(11).

5. Cengiz M, Ozenirler S. Comparative diagnostic accuracy of red cell distribution width-to-platelet ratio versus noninvasive fibrosis scores for the diagnosis of liver fibrosis in biopsy-proven nonalcoholic fatty liver disease. European Journal of Gastroenterology and Hepatology. 2015;27(11):1293-9.

6. Duman S, Kuru D, Gumussoy M, Kiremitci S, Gokcan H, Ulas B, et al. A combination of non-invasive tests for the detection of significant fibrosis in patients with metabolic dysfunction-associated steatotic liver disease is not superior to magnetic resonance elastography alone. European Radiology. 2023.

7. Lu WJ, Deng BY. Quantitative assessment of hepatic fibrosis in patients with nonalcoholic fatty liver disease by magnetic reso nance elastography and its relationship with serum liver function indexes. Clinical Education of General Practice. 2022;20(9):774-7.

8. Lee JS, Lee HW, Kim BK, Park JY, Kim DY, Ahn SH, et al. Comparison of FibroScan-Aspartate Aminotransferase (FAST) Score and Other Non-invasive Surrogates in Predicting High-Risk Non-alcoholic Steatohepatitis Criteria. Frontiers in Medicine. 2022;9.

9. Yoneda M, Imajo K, Eguchi Y, Fujii H, Sumida Y, Hyogo H, et al. Noninvasive scoring systems in patients with nonalcoholic fatty liver disease with normal alanine aminotransferase levels. J Gastroenterol. 2013;48(9):1051-60.

10. Ren H, Xu H, Yang DW, Wang XP, Tong XF, Zhao XY, et al. Assessment of Liver Fibrosis in Nonalcoholic Fatty Liver Disease via Magnetic Resonance Elastography. Chinese Journal of Medical Imaging. 2022;30(02):106-10.

11. Nasr P, Hilliges A, Thorelius L, Kechagias S, Ekstedt M. Contrast-enhanced ultrasonography could be a non-invasive method for differentiating none or mild from severe fibrosis in patients with biopsy proven non-alcoholic fatty liver disease. Scandinavian Journal of Gastroenterology. 2016;51(9):1126-32.

12. Kakisaka K, Suzuki Y, Fujiwara Y, Abe T, Yonezawa M, Kuroda H, et al. Evaluation of ballooned hepatocytes as a risk factor for future progression of fibrosis in patients with non-alcoholic fatty liver disease. J Gastroenterol. 2018;53(12):1285-91.

13. Yang RN, Fu J, Wang DQ. Diagnostic value of multimodal imaging technology with ultrasound shear-wave elastography in metabolisc-associated fatty liver disease. hepatoday. 2023;28(9).

14. Naveau S, Voican CS, Lebrun A, Gaillard M, Lamouri K, Njiké-Nakseu M, et al. Controlled attenuation parameter for diagnosing steatosis in bariatric surgery candidates with suspected nonalcoholic fatty liver disease. European Journal of Gastroenterology and Hepatology. 2017;29(9):1022-30.

15. Ogino Y, Wakui N, Nagai H, Matsuda T. Comparison of strain elastography and shear wave elastography in diagnosis of fibrosis in nonalcoholic fatty liver disease. Journal of Medical Ultrasonics. 2023;50(2):187-95.

16. Li GH, Xie X, Huang ZX, Zhang MY, Tang YY. Quantitative evaluation of transient elastography and acoustic radiation force pulse imaging for non-alcoholic fatty liver disease. Clinical Focus. 2021;36(6):535-9.

17. Qu Y, Song YY, Chen CW, Fu QC, Shi JP, Xu Y, et al. Diagnostic Performance of FibroTouch Ultrasound Attenuation Parameter and Liver Stiffness Measurement in Assessing Hepatic Steatosis and Fibrosis in Patients with Nonalcoholic Fatty Liver Disease. Clinical and Translational Gastroenterology. 2021;12(4):E00323.

18. Bertot LC, Jeffrey GP, de Boer B, Wang Z, Huang Y, Garas G, et al. Comparative Accuracy of Clinical Fibrosis Markers, Hepascore and Fibroscan® to Detect Advanced Fibrosis in Patients with Nonalcoholic Fatty Liver Disease. Dig Dis Sci. 2023;68(6):2757-67.

19. Li SJ. Non invasive diagnosis of significant liver fibrosis in non-alcoholic fatty liver disease. World Chinese Journal of Digestology 2012;20(3):233-7.

20. Maher MM, Ibrahim WA, Saleh SA, Shash L, Abou Gabal H, Tarif M, et al. Cytokeratin 18 as a non invasive marker in diagnosis of NASH and its usefulness in correlation with disease severity in Egyptian patients. Egyptian Journal of Medical Human Genetics. 2015;16(1):41-6.

21. Marañón P, Fernández-García CE, Isaza SC, Rey E, Gallego-Durán R, Montero-Vallejo R, et al. Bone morphogenetic protein 2 is a new molecular target linked to non-alcoholic fatty liver disease with potential value as non-invasive screening tool. Biomark Res. 2022;10(1):35.

22. Hu Y. Research on non-invasive diagnosis of non-alcoholic steatohepatitis and fibrosis [硕士]: Zunyi Medical University; 2019.

23. Huang JF, Yeh ML, Huang CF, Huang CI, Tsai PC, Tai CM, et al. Cytokeratin-18 and uric acid predicts disease severity in Taiwanese nonalcoholic steatohepatitis patients. PLoS One. 2017;12(5):e0174394.

24. Seki K, Shima T, Oya H, Mitsumoto Y, Mizuno M, Okanoue T. Assessment of transient elastography in Japanese patients with non-alcoholic fatty liver disease. Hepatology Research. 2017;47(9):882-9.

25. Li YD. The Value of Golgi Protein 73 Expression in the Diagnosis of Non-Alcoholic Fatty Liver Disease and the Staging of Liver Fibrosis [硕士]2020.

26. Feldstein AE, Wieckowska A, Lopez AR, Liu YC, Zein NN, McCullough AJ. Cytokeratin-18 fragment levels as noninvasive biomarkers for nonalcoholic steatohepatitis: a multicenter validation study. Hepatology. 2009;50(4):1072-8.

27. Noureddin M, Truong E, Mayo R, Martínez-Arranz I, Mincholé I, Banales JM, et al. Serum identification of at-risk MASH: The metabolomics-advanced steatohepatitis fibrosis score (MASEF). Hepatology. 2024;79(1):135-48.

28. Wang L, Qu HJ, Yang WJ, Ding JP, Shi JP, Zhang QL. Metabolic study of iron deposition in non-alcoholic fatty liver disease patients based on MRI. Chinese Journal of Hepatology. 2023;31(11):1204-8.

29. Tavaglione F, Jamialahmadi O, De Vincentis A, Qadri S, Mowlaei ME, Mancina RM, et al. Development and Validation of a Score for Fibrotic Nonalcoholic Steatohepatitis. Clinical Gastroenterology and Hepatology. 2023;21(6):1523-32.e1.

30. Sharpton SR, Tamaki N, Bettencourt R, Madamba E, Jung J, Liu A, et al. Diagnostic accuracy of two-dimensional shear wave elastography and transient elastography in nonalcoholic fatty liver disease. Therap Adv Gastroenterol. 2021;14:17562848211050436.

31. He XZ. Fastingc-peptide , FB 4 joint LSM in NAFLD patients with diabetes mellitus assessment value of liver fibrosis. Journal of Snake. 2022;34(4):475-8,82.

32. Di Martino M, Pacifico L, Bezzi M, Di Miscio R, Sacconi B, Chiesa C, et al. Comparison of magnetic resonance spectroscopy, proton density fat fraction and histological analysis in the quantification of liver steatosis in children and adolescents. World J Gastroenterol. 2016;22(39):8812-9.

33. Shen J, Chan HLY, Wong GLH, Choi PCL, Chan AWH, Chan HY, et al. Non-invasive diagnosis of non-alcoholic steatohepatitis by combined serum biomarkers. Journal of Hepatology. 2012;56(6):1363-70.

34. Wang M, Liu TT, Wang XM, Yang XX, Luo WP, Duan WJ, et al. Comparison of acoustic radiation force impulse and transient electrography for the diagnosis of fibrosis in patients with non - alcoholic fatty liver disease. Journal of Clinical and Experimental Medicine. 2018;17(2):124-8.

35. Boursier J, Vergniol J, Guillet A, Hiriart JB, Lannes A, Le Bail B, et al. Diagnostic accuracy and prognostic significance of blood fibrosis tests and liver stiffness measurement by FibroScan in non-alcoholic fatty liver disease. Journal of Hepatology. 2016;65(3):570-8.

36. Tapper EB, Challies T, Nasser I, Afdhal NH, Lai M. The performance of vibration controlled transient elastography in a US cohort of patients with nonalcoholic fatty liver disease. American Journal of Gastroenterology. 2016;111(5):677-84.

37. Zhang DK, Chen M, Wang RF, Liu Y, Dong XY, Li ZY, et al. Value of acoustic radiation force impulse imaging on nonalcoholic fatty liver disease in comparison with pathological study. Chinese Journal of Clinicians (Electronic Edition) 2012;6(15):4253-7.

38. Seko Y, Takahashi H, Toyoda H, Hayashi H, Yamaguchi K, Iwaki M, et al. Diagnostic accuracy of enhanced liver fibrosis test for nonalcoholic steatohepatitis-related fibrosis: Multicenter study. Hepatology Research. 2023;53(4):312-21.

39. Jang TY, Huang CF, Yeh ML, Huang CI, Dai CY, Tsai PC, et al. Serum Wisteria floribunda agglutinin-positive Mac-2-binding protein expression predicts disease severity in nonalcoholic steatohepatitis patients. Kaohsiung Journal of Medical Sciences. 2022;38(3):261-7.

40. Sun LL, Zheng Q, Bao J, Dong G. Study on the relationship between real-time shear wave elasticity imaging and serum examination in patients with non-alcoholic fatty liver disease. Chinese Journal of Gastroenterology and Hepatology 2017;26(10):1121-4.

41. Zhao GD, Guo SM, Xie Q, Gui HL. Diagnostic accuracy of FibroScan-AST score in nonalcoholic steatohepatitis with signifcant activity and fbrosis. Journal of Clinical Hepatology. 2022;38(06):1288-92.

42. Okajima A, Sumida Y, Taketani H, Hara T, Seko Y, Ishiba H, et al. Liver stiffness measurement to platelet ratio index predicts the stage of liver fibrosis in non-alcoholic fatty liver disease. Hepatology Research. 2017;47(8):721-30.

43. Zhang SQ, Wang TT, Zhang YH. Significant and advanced liver fibrosis in patients with non-alcoholic steatohepatitis: What is the performance of real- time tissue elastography evaluation? Journal of Practical Hepatology. 2024;27(1):48-51.

44. Sanyal AJ, Shankar SS, Yates KP, Bolognese J, Daly E, Dehn CA, et al. Diagnostic performance of circulating biomarkers for non-alcoholic steatohepatitis. Nature Medicine. 2023;29(10):2656-64.

45. Fierbinteanu-Braticevici C, Calin-Necula AM, Enciu VT, Goran L, Pantea Stoian A, Ancuta I, et al. The Role of Noninvasive 13C-Octanoate Breath Test in Assessing the Diagnosis of Nonalcoholic Steatohepatitis. Diagnostics. 2022;12(12).

46. Fu YM, Wang CY, Li ZB, Wang JJ, Chen SH, Yang WC, et al. Grading diagnostic efficiency of controlled attenuation parameter on hepatic steatosis of patients with nonalcoholic fatty liver disease. Military Medical Research. 2022;47(6):593-8.

47. Dincses E, Yilmaz Y. Diagnostic usefulness of FibroMeter VCTE for hepatic fibrosis in patients with nonalcoholic fatty liver disease. European Journal of Gastroenterology and Hepatology. 2015;27(10):1149-53.

48. Rivière B, Jaussent A, Macioce V, Faure S, Builles N, Lefebvre P, et al. The triglycerides and glucose (TyG) index: A new marker associated with nonalcoholic steatohepatitis (NASH) in obese patients. Diabetes Metab. 2022;48(4):101345.

49. He SL, Li SJ, Liu M, Ouyang WX, Chen WJ, Zheng X, et al. Study on the diagnostic value of transient elastography, APRI, and FIB-4 for liver fibrosis in children with non-alcoholic fatty liver disease. Chinese Journal of Hepatology. 2022;30(1):81-6.

50. Zhao Y, Qiu C, Dong Y, Wang X, Chen J, Yao J, et al. Technical Acoustic Measurements Combined with Clinical Parameters for the Differential Diagnosis of Nonalcoholic Steatohepatitis. Diagnostics. 2023;13(9).

51. Jafarov F, Kaya E, Bakir A, Eren F, Yilmaz Y. The diagnostic utility of fibrosis-4 or nonalcoholic fatty liver disease fibrosis score combined with liver stiffness measurement by fibroscan in assessment of advanced liver fibrosis: A biopsy-proven nonalcoholic fatty liver disease study. European Journal of Gastroenterology and Hepatology. 2020;32(5):642-9.

52. Song XG, He YB. Clinical application of transient elastography in detecting liver fibrosis and steatosis in NAFLD patients. hepatoday. 2020;25(05):536-8.

53. Guillaume M, Moal V, Delabaudiere C, Zuberbuhler F, Robic MA, Lannes A, et al. Direct comparison of the specialised blood fibrosis tests FibroMeterV2G and Enhanced Liver Fibrosis score in patients with non-alcoholic fatty liver disease from tertiary care centres. Alimentary Pharmacology and Therapeutics. 2019;50(11-12):1214-22.

54. Chan WK, Nik Mustapha NR, Wong GL, Wong VW, Mahadeva S. Controlled attenuation parameter using the FibroScan® XL probe for quantification of hepatic steatosis for non-alcoholic fatty liver disease in an Asian population. United European Gastroenterol J. 2017;5(1):76-85.

55. Tian S. Diagnostic Value of Serological Markers in

Nonalcoholic Fatty Liver Disease [硕士]2019.

56. Imajo K, Honda Y, Kobayashi T, Nagai K, Ozaki A, Iwaki M, et al. Direct Comparison of US and MR Elastography for Staging Liver Fibrosis in Patients With Nonalcoholic Fatty Liver Disease. Clin Gastroenterol Hepatol. 2022;20(4):908-17.e11.

57. Taibbi A, Petta S, Matranga D, Caruana G, Cannella R, Busè G, et al. Liver stiffness quantification in biopsy-proven nonalcoholic fatty liver disease patients using shear wave elastography in comparison with transient elastography. Ultrasonography. 2021;40(3):407-16.

58. Tian YY, Chen Y, Ding DP, Zhang YH, Ao KJ. Value of serum soluble sH2a combined with slCAM-1 in the diagnosis of hepatic fibrosis in patients with nonalcoholic fatty liver disease. Chinese Journal of Integrated Traditional and Western Medicine on Digestion. 2018;26(2):159-62,66.

59. Yang X, Xia M, Chang X, Zhu X, Sun X, Yang Y, et al. A novel model for detecting advanced fibrosis in patients with nonalcoholic fatty liver disease. Diabetes Metab Res Rev. 2022;38(8):e3570.

60. Prasoppokakorn T, Chan WK, Wong VWS, Pitisuttithum P, Mahadeva S, Nik Mustapha NR, et al. Validation model of fibrosis-8 index score to predict significant fibrosis among patients with nonalcoholic fatty liver disease. World Journal of Gastroenterology. 2022;28(15):1563-73.

61. Li Y, Xiao L, Geng AW, Xian JC, Gan JH. Diagnosis value of serumimmunoglobulin for liver fbrosis in patients with non-alcoholic fatty liver disease. Chinese Journal of Practical Internal Medicine. 2015;35(7):603-5.

62. Hendy OM, Rabie H, Fouly AE, Abdel-Samiee M, Abdelmotelb N, Elshormilisy AA, et al. The circulating micro-RNAs (−122, −34a and −99a) as predictive biomarkers for non-alcoholic fatty liver diseases. Diabetes, Metabolic Syndrome and Obesity. 2019;12:2715-23.

63. Raszeja-Wyszomirska J, Szymanik B, Ławniczak M, Kajor M, Chwist A, Milkiewicz P, et al. Validation of the BARD scoring system in Polish patients with nonalcoholic fatty liver disease (NAFLD). BMC Gastroenterol. 2010;10:67.

64. Li L, Min RQ, Zhan YT, Zhao SJ. Signiftcance of serum retinol-binding protein 4 in the diagnosis of patients with nonalcoholic steatohepatitis. Journal of Practical Hepatology. 2011;14(05):351-3.

65. Lu M, Zhu M, Li H, Wang Q, Qian Y, Wang M, et al. Factors associated with discordance in the assessment of fibrosis stage between transient elastography and liver biopsy in NAFLD patients. Clinics and Research in Hepatology and Gastroenterology. 2023;47(7).

66. Canivet CM, Zheng MH, Qadri S, Vonghia L, Chuah KH, Costentin C, et al. Validation of the Blood Test MACK-3 for the Noninvasive Diagnosis of Fibrotic Nonalcoholic Steatohepatitis: An International Study With 1924 Patients. Clin Gastroenterol Hepatol. 2023;21(12):3097-106.e10.

67. Yu PR, Fang TY, Liu ZJ, Wen ZY, Mo QJ. Significance of serum retinol-binding protein 4 in the diagnosis of patients with nonalcoholic steatohepatitis. Journal of Practical Hepatology. 2021;26(12):1391-5.

68. De A, Keisham A, Mishra S, Mehta M, Verma N, Premkumar M, et al. FibroScan-AST (FAST) Score for Nonalcoholic Steatohepatitis – Validation in an Indian Cohort. Journal of Clinical and Experimental Hepatology. 2022;12(2):440-7.

69. Sumida Y, Yoneda M, Hyogo H, Itoh Y, Ono M, Fujii H, et al. Validation of the FIB4 index in a Japanese nonalcoholic fatty liver disease population. BMC Gastroenterol. 2012;12:2.

70. Gao J, Guo XS, Han LJ. The predictive value of serum ASMase level on the degree of liver fibrosis in patients with non-alcoholic fatty liver disease. Hepatoday. 2019;24(8):926-8.

71. Lykiardopoulos B, Hagström H, Fredrikson M, Ignatova S, Stål P, Hultcrantz R, et al. Development of Serum marker models to increase diagnostic accuracy of advanced fibrosis in nonalcoholic fatty liver disease: The new LINKI algorithm compared with established algorithms. PLoS ONE. 2016;11(12).

72. Pérez-Gutiérrez OZ, Hernández-Rocha C, Candia-Balboa RA, Arrese MA, Benítez C, Brizuela-Alcántara DC, et al. Validation study of systems for noninvasive diagnosis of fibrosis in nonalcoholic fatty liver disease in Latin population. Annals of Hepatology. 2013;12(3):416-24.

73. Ge GY. The diagnostic value of serum ck18-m30, M65 fragment and TNF-a in nonalcoholic fatty liver disease [硕士]2020.

74. Furlan A, Tublin ME, Yu L, Chopra KB, Lippello A, Behari J. Comparison of 2D shear wave elastography, transient elastography, and MR elastography for the diagnosis of fibrosis in patients with nonalcoholic fatty liver disease. American Journal of Roentgenology. 2020;214(1):W20-W6.

75. Yang M, Jiang L, Wang Y, Li X, Zou Z, Han T, et al. Step layered combination of noninvasive fibrosis models improves diagnostic accuracy of advanced fibrosis in nonalcoholic fatty liver disease. J Gastrointestin Liver Dis. 2019;28(3):289-96.

76. Yang M, Guo XD, Guo CN, Liu Y, Zhu L, Zhao JM. Study of Serum L .evel of IL- 1RA Level with Non-alcoholic Fatty Liver Disease and the Non-invasive Diagnostic. Progress in Modern Biomedicine. 2014;14(28):5520-4.

77. Kaya E, Bakir A, Kani HT, Demirtas CO, Keklikkiran C, Yilmaz Y. Simple noninvasive scores are clinically useful to exclude, not predict, advanced fibrosis: A study in turkish patients with biopsy-proven nonalcoholic fatty liver disease. Gut and Liver. 2020;14(4):486-91.

78. Welsh JA, Scorletti E, Clough GF, Englyst NA, Byrne CD. Leukocyte extracellular vesicle concentration is inversely associated with liver fibrosis severity in NAFLD. Journal of Leukocyte Biology. 2018;104(3):631-9.

79. Zhang DK, Chen M, Liu Y, Wang RF, Zhou GD, Dong XY. The diagnostic value of ARFI imaging and APRI for quantitative evaluating the degree of liver fibrosis in NAFLD patients. Journal of China Clinic Medical Imaging. 2013;24(3):178-81,87.

80. Moon SY, Baek YH, Jang SY, Jun DW, Yoon KT, Cho YY, et al. Proposal of a Novel Serological Algorithm Combining FIB-4 and Serum M2BPGi for Advanced Fibrosis in Nonalcoholic Fatty Liver Disease. Gut and liver. 2023.

81. Ogawa Y, Honda Y, Kessoku T, Tomeno W, Imajo K, Yoneda M, et al. Wisteria floribunda agglutinin-positive Mac-2-binding protein and type 4 collagen 7S: useful markers for the diagnosis of significant fibrosis in patients with non-alcoholic fatty liver disease. Journal of Gastroenterology and Hepatology (Australia). 2018;33(10):1795-803.

82. Chen XY. The diagnostic value of ARFI and PW in non-alcoholic fatty liver disease fibrosis [硕士]2016.

83. Li J, Lu X, Zhu Z, Kalutkiewicz KJ, Mounajjed T, Therneau TM, et al. Head-to-head comparison of magnetic resonance elastography-based liver stiffness, fat fraction, and T1 relaxation time in identifying at-risk NASH. Hepatology. 2023;78(4):1200-8.

84. Yilmaz Y, Dolar E, Ulukaya E, Akgoz S, Keskin M, Kiyici M, et al. Soluble forms of extracellular cytokeratin 18 may differentiate simple steatosis from nonalcoholic steatohepatitis. World J Gastroenterol. 2007;13(6):837-44.

85. Leng XJ, Yan XB. Efficiency of FibroTouch in evaluating liver fibrosis degree in nonalcoholic fatty liver disease patients with different levels of body mass index. Journal of Clinical Hepatology. 2018;34(9):1891-5.

86. Kim BK, Tamaki N, Imajo K, Yoneda M, Sutter N, Jung J, et al. Head-to-head comparison between MEFIB, MAST, and FAST for detecting stage 2 fibrosis or higher among patients with NAFLD. J Hepatol. 2022;77(6):1482-90.

87. Fujimori N, Umemura T, Kimura T, Tanaka N, Sugiura A, Yamazaki T, et al. Serum autotaxin levels are correlated with hepatic fibrosis and ballooning in patients with non-alcoholic fatty liver disease. World Journal of Gastroenterology. 2018;24(11):1239-49.

88. Xie X, Liu T, Dong ZX, Xia YC, Zhang QD, Qu Y, et al. Value of controlled attenuation parameter in diagnosis of individuals with liver steatosis by using Fibrotouch. Journal of Practical Hepatology. 2019;22(4):526-9.

89. Inadomi C, Takahashi H, Ogawa Y, Oeda S, Imajo K, Kubotsu Y, et al. Accuracy of the Enhanced Liver Fibrosis test, and combination of the Enhanced Liver Fibrosis and non-invasive tests for the diagnosis of advanced liver fibrosis in patients with non-alcoholic fatty liver disease. Hepatology Research. 2020;50(6):682-92.

90. Hernández-Conde M, Llop E, Carrillo CF, Tormo B, Abad J, Rodriguez L, et al. Estimation of visceral fat is useful for the diagnosis of significant fibrosis in patients with non-alcoholic fatty liver disease. World Journal of Gastroenterology. 2020;26(42):6658-68.

91. Huang JS, Wen JR, Song GJ, Jiang XL, LI W, Wang M, et al. Study on the prediction of liver fibrosis in patients with non-alcoholic fatty liver disease by reducing MRI-PDFF. Journal of Imaging Research and Medical Applications. 2022;6(23):69-71.

92. Jia X, Song E, Liu Y, Chen J, Wan P, Hu Y, et al. Identification and multicentric validation of soluble CDCP1 as a robust serological biomarker for risk stratification of NASH in obese Chinese. Cell Rep Med. 2023;4(11):101257.

93. Younes R, Rosso C, Petta S, Cucco M, Marietti M, Caviglia GP, et al. Usefulness of the index of NASH – ION for the diagnosis of steatohepatitis in patients with non-alcoholic fatty liver: An external validation study. Liver International. 2018;38(4):715-23.

94. Zhang YL, Ma YJ, Wang ZL, Wang YJ, Yang L, Zhu SH. Evaluation of four scoring systems in diagnosis of hepatic fibrosis in patients with nonalcoholic fatty liver disease. China Journal of Modern Medicine. 2017;27(22):112-6.

95. Noureddin M, Mena E, Vuppalanchi R, Samala N, Wong M, Pacheco F, et al. Increased accuracy in identifying NAFLD with advanced fibrosis and cirrhosis: independent validation of the Agile 3+ and 4 scores. Hepatol Commun. 2023;7(5).

96. Zain SM, Tan HL, Mohamed Z, Chan WK, Mahadeva S, Basu RC, et al. Use of simple scoring systems for a public health approach in the management of non-alcoholic fatty liver disease patients. JGH Open. 2020;4(6):1155-61.

97. Leivas G, Maraschin CK, Blume CA, Telo GH, Trindade MRM, Trindade EN, et al. Accuracy of ultrasound diagnosis of nonalcoholic fatty liver disease in patients with classes II and III obesity: A pathological image study. Obesity Research and Clinical Practice. 2021;15(5):461-5.

98. Feng G, Zheng KI, Li YY, Rios RS, Zhu PW, Pan XY, et al. Machine learning algorithm outperforms fibrosis markers in predicting significant fibrosis in biopsy-confirmed NAFLD. J Hepatobiliary Pancreat Sci. 2021;28(7):593-603.

99. Zambrano-Huailla R, Guedes L, Stefano JT, de Souza AAA, Marciano S, Yvamoto E, et al. Diagnostic performance of three non-invasive fibrosis scores (Hepamet, FIB-4, NAFLD fibrosis score) in NAFLD patients from a mixed Latin American population. Ann Hepatol. 2020;19(6):622-6.

100. Harrison SA, Ratziu V, Boursier J, Francque S, Bedossa P, Majd Z, et al. A blood-based biomarker panel (NIS4) for non-invasive diagnosis of non-alcoholic steatohepatitis and liver fibrosis: a prospective derivation and global validation study. The lancet Gastroenterology & hepatology. 2020;5(11):970‐85.

101. Xun YH, Fan JG, Zang GQ, Liu H, Jiang YM, Xiang J, et al. Suboptimal performance of simple noninvasive tests for advanced fibrosis in Chinese patients with nonalcoholic fatty liver disease. Journal of Digestive Diseases. 2012;13(11):588-95.

102. Zheng KI, Liu WY, Pan XY, Ma HL, Zhu PW, Wu XX, et al. Combined and sequential non-invasive approach to diagnosing non-alcoholic steatohepatitis in patients with non-alcoholic fatty liver disease and persistently normal alanine aminotransferase levels. BMJ Open Diabetes Res Care. 2020;8(1).

103. Vali Y, Lee J, Boursier J, Petta S, Wonders K, Tiniakos D, et al. Biomarkers for staging fibrosis and non-alcoholic steatohepatitis in non-alcoholic fatty liver disease (the LITMUS project): a comparative diagnostic accuracy study. The Lancet Gastroenterology and Hepatology. 2023;8(8):714-25.

104. Adams LA, George J, Bugianesi E, Rossi E, De Boer WB, van der Poorten D, et al. Complex non-invasive fibrosis models are more accurate than simple models in non-alcoholic fatty liver disease. J Gastroenterol Hepatol. 2011;26(10):1536-43.

105. Alqahtani SA, Golabi P, Paik JM, Lam B, Moazez AH, Elariny HA, et al. Performance of Noninvasive Liver Fibrosis Tests in Morbidly Obese Patients with Nonalcoholic Fatty Liver Disease. Obesity Surgery. 2021;31(5):2002-10.

106. Semmler G, Wöran K, Scheiner B, Unger LW, Paternostro R, Stift J, et al. Novel reliability criteria for controlled attenuation parameter assessments for non-invasive evaluation of hepatic steatosis. United European Gastroenterology Journal. 2020;8(3):321-31.

107. de Lédinghen V, Wong GLH, Vergniol J, Chan HLY, Hiriart JB, Chan AWH, et al. Controlled attenuation parameter for the diagnosis of steatosis in non-alcoholic fatty liver disease. Journal of Gastroenterology and Hepatology (Australia). 2016;31(4):848-55.

108. Daniels SJ, Leeming DJ, Eslam M, Hashem AM, Nielsen MJ, Krag A, et al. ADAPT: An Algorithm Incorporating PRO-C3 Accurately Identifies Patients With NAFLD and Advanced Fibrosis. Hepatology. 2019;69(3):1075-86.

109. López IC, Aroca FG, Bernal MDF, Mompeán JAL, Bernal ÁB, Martínez AMH, et al. Utility of the ELF Test for Detecting Steatohepatitis in Morbid Obese Patients with Suspicion of Nonalcoholic Fatty Liver Disease. Obesity Surgery. 2017;27(9):2347-53.

110. Leong WL, Lai LL, Nik Mustapha NR, Vijayananthan A, Rahmat K, Mahadeva S, et al. Comparing point shear wave elastography (ElastPQ) and transient elastography for diagnosis of fibrosis stage in non-alcoholic fatty liver disease. J Gastroenterol Hepatol. 2020;35(1):135-41.

111. Erhardtsen E, Rasmussen DGK, Frederiksen P, Leeming DJ, Shevell D, Gluud LL, et al. Determining a healthy reference range and factors potentially influencing PRO-C3 - A biomarker of liver fibrosis. JHEP Rep. 2021;3(4):100317.

112. Sheth H, Bagasrawala S, Shah M, Ansari R, Olithselvan A, Lakdawala M. The HAALT Non-invasive Scoring System for NAFLD in Obesity. Obes Surg. 2019;29(8):2562-70.

113. Inada K, Tamaki N, Kurosaki M, Kirino S, Yamashita K, Hayakawa Y, et al. Validation of magnetic resonance elastography plus fibrosis-4 for significant fibrosis in nonalcoholic fatty liver disease. Journal of Gastroenterology and Hepatology (Australia). 2022;37(9):1726-31.

114. Huber Y, Pfirrmann D, Gebhardt I, Labenz C, Gehrke N, Straub BK, et al. Improvement of non-invasive markers of NAFLD from an individualised, web-based exercise program. Aliment Pharmacol Ther. 2019;50(8):930-9.

115. Shalimar, Kumar R, Rout G, Kumar R, Yadav R, Das P, et al. Body mass index–based controlled attenuation parameter cut-offs for assessment of hepatic steatosis in non-alcoholic fatty liver disease. Indian Journal of Gastroenterology. 2020;39(1):32-41.

116. Woreta TA, Van Natta ML, Lazo M, Krishnan A, Neuschwander-Tetri BA, Loomba R, et al. Validation of the accuracy of the FAST™ score for detecting patients with at-risk nonalcoholic steatohepatitis (NASH) in a North American cohort and comparison to other non-invasive algorithms. PLoS One. 2022;17(4):e0266859.

117. Luo Y, Oseini A, Gagnon R, Charles ED, Sidik K, Vincent R, et al. An Evaluation of the Collagen Fragments Related to Fibrogenesis and Fibrolysis in Nonalcoholic Steatohepatitis. Sci Rep. 2018;8(1):12414.

118. Tovo CV, Villela-Nogueira CA, Leite NC, Panke CL, Port GZ, Fernandes S, et al. Transient hepatic elastography has the best performance to evaluate liver fibrosis in non-alcoholic fatty liver disease (NAFLD). Annals of Hepatology. 2019;18(3):445-9.

119. Kiyoaki I, Sumida Y, Nakade Y, Okumura A, Nishimura S, Ibusuki M, et al. Mac-2 binding protein glycosylation isomer, the FIB-4 index, and a combination of the two as predictors of non-alcoholic steatohepatitis. PLoS ONE. 2022;17(11 November).

120. Nielsen MJ, Leeming DJ, Goodman Z, Friedman S, Frederiksen P, Rasmussen DGK, et al. Comparison of ADAPT, FIB-4 and APRI as non-invasive predictors of liver fibrosis and NASH within the CENTAUR screening population. J Hepatol. 2021;75(6):1292-300.

121. Ratziu V, Massard J, Charlotte F, Messous D, Imbert-Bismut F, Bonyhay L, et al. Diagnostic value of biochemical markers (FibroTest-FibroSURE) for the prediction of liver fibrosis in patients with non-alcoholic fatty liver disease. BMC Gastroenterol. 2006;6:6.

122. Kawamura Y, Saitoh S, Arase Y, Ikeda K, Fukushima T, Hara T, et al. Three-dimensional magnetic resonance imaging for stringent diagnosis of advanced fibrosis associated with nonalcoholic steatohepatitis. Hepatology International. 2013;7(3):850-8.

123. Boyle M, Tiniakos D, Schattenberg JM, Ratziu V, Bugianessi E, Petta S, et al. Performance of the PRO-C3 collagen neo-epitope biomarker in non-alcoholic fatty liver disease. JHEP Rep. 2019;1(3):188-98.

124. Poynard T, Ratziu V, Charlotte F, Messous D, Munteanu M, Imbert-Bismut F, et al. Diagnostic value of biochemical markers (NashTest) for the prediction of non alcoholo steato hepatitis in patients with non-alcoholic fatty liver disease. BMC Gastroenterol. 2006;6:34.

125. Kosick HM, Keyrouz A, Adeyi O, Sebastiani G, Patel K. A Stepwise Algorithmic Approach and External Validation Study for Noninvasive Prediction of Advanced Fibrosis in Nonalcoholic Fatty Liver Disease. Dig Dis Sci. 2021;66(11):4046-57.

126. Tang LJ, Ma HL, Eslam M, Wong GL, Zhu PW, Chen SD, et al. Among simple non-invasive scores, Pro-C3 and ADAPT best exclude advanced fibrosis in Asian patients with MAFLD. Metabolism. 2022;128:154958.

127. Boursier J, Guillaume M, Leroy V, Irlès M, Roux M, Lannes A, et al. New sequential combinations of non-invasive fibrosis tests provide an accurate diagnosis of advanced fibrosis in NAFLD. J Hepatol. 2019;71(2):389-96.

128. Kuroda H, Abe T, Fujiwara Y, Nagasawa T, Takikawa Y. Diagnostic accuracy of ultrasound-guided attenuation parameter as a noninvasive test for steatosis in non-alcoholic fatty liver disease. J Med Ultrason (2001). 2021;48(4):471-80.

129. Wibulpolprasert P, Subpinyo B, Chirnaksorn S, Shantavasinkul PC, Putadechakum S, Phongkitkarun S, et al. Correlation between magnetic resonance imaging proton density fat fraction (MRI-PDFF) and liver biopsy to assess hepatic steatosis in obesity. Sci Rep. 2024;14(1):6895.

130. Zhou J, Yan F, Xu J, Lu Q, Zhu X, Gao B, et al. Diagnosis of steatohepatitis and fibrosis in biopsy-proven nonalcoholic fatty liver diseases: Including two-dimension real-time shear wave elastography and noninvasive fibrotic biomarker scores. Quantitative Imaging in Medicine and Surgery. 2022;12(3):1800-14.

131. Lassailly G, Caiazzo R, Hollebecque A, Buob D, Leteurtre E, Arnalsteen L, et al. Validation of noninvasive biomarkers (FibroTest, SteatoTest, and NashTest) for prediction of liver injury in patients with morbid obesity. Eur J Gastroenterol Hepatol. 2011;23(6):499-506.

132. Middleton MS, Van Natta ML, Heba ER, Alazraki A, Trout AT, Masand P, et al. Diagnostic accuracy of magnetic resonance imaging hepatic proton density fat fraction in pediatric nonalcoholic fatty liver disease. Hepatology. 2018;67(3):858-72.

133. Kim JW, Lee CH, Kim BH, Lee YS, Hwang SY, Park BN, et al. Ultrasonographic index for the diagnosis of non-alcoholic steatohepatitis in patients with non-alcoholic fatty liver disease. Quantitative Imaging in Medicine and Surgery. 2022;12(3):1815-29.

134. Verma S, Jensen D, Hart J, Mohanty SR. Predictive value of ALT levels for non-alcoholic steatohepatitis (NASH) and advanced fibrosis in non-alcoholic fatty liver disease (NAFLD). Liver International. 2013;33(9):1398-405.

135. Imajo K, Kessoku T, Honda Y, Tomeno W, Ogawa Y, Mawatari H, et al. Magnetic Resonance Imaging More Accurately Classifies Steatosis and Fibrosis in Patients with Nonalcoholic Fatty Liver Disease Than Transient Elastography. Gastroenterology. 2016;150(3):626-37e7.

136. Kim JW, Lee CH, Yang Z, Kim BH, Lee YS, Kim KA. The spectrum of magnetic resonance imaging proton density fat fraction (MRI-PDFF), magnetic resonance spectroscopy (MRS), and two different histopathologic methods (artificial intelligence vs. pathologist) in quantifying hepatic steatosis. Quantitative Imaging in Medicine and Surgery. 2022;12(11):5251-62.

137. Siddiqui MS, Patidar KR, Boyett S, Luketic VA, Puri P, Sanyal AJ. Performance of non-invasive models of fibrosis in predicting mild to moderate fibrosis in patients with non-alcoholic fatty liver disease. Liver International. 2016;36(4):572-9.

138. Middleton MS, Heba ER, Hooker CA, Bashir MR, Fowler KJ, Sandrasegaran K, et al. Agreement Between Magnetic Resonance Imaging Proton Density Fat Fraction Measurements and Pathologist-Assigned Steatosis Grades of Liver Biopsies From Adults With Nonalcoholic Steatohepatitis. Gastroenterology. 2017;153(3):753-61.

139. Li G, Zheng TL, Chi X, Zhu YF, Chen J, Xu L, et al. LEARN algorithm: a novel option for predicting non-alcoholic steatohepatitis. Journal of hepatology. 2022;77:S421‐S2.

140. Joo SK, Kim W, Kim D, Kim JH, Oh S, Lee KL, et al. Steatosis severity affects the diagnostic performances of noninvasive fibrosis tests in nonalcoholic fatty liver disease. Liver Int. 2018;38(2):331-41.

141. Shao CX, Ye J, Dong Z, Li F, Lin Y, Liao B, et al. Steatosis grading consistency between controlled attenuation parameter and MRI-PDFF in monitoring metabolic associated fatty liver disease. Therapeutic Advances in Chronic Disease. 2021;12.

142. Aykut UE, Akyuz U, Yesil A, Eren F, Gerin F, Ergelen R, et al. A comparison of FibroMeter™ NAFLD Score, NAFLD fibrosis score, and transient elastography as noninvasive diagnostic tools for hepatic fibrosis in patients with biopsy-proven non-alcoholic fatty liver disease. Scand J Gastroenterol. 2014;49(11):1343-8.

143. Roccarina D, Iogna Prat L, Pallini G, Guerrero Misas M, Buzzetti E, Saffioti F, et al. Comparison of point-shear wave elastography (ElastPQ) and transient elastography (FibroScan) for liver fibrosis staging in patients with non-alcoholic fatty liver disease. Liver International. 2022;42(10):2195-203.

144. Tang A, Tan J, Sun M, Hamilton G, Bydder M, Wolfson T, et al. Nonalcoholic fatty liver disease: MR imaging of liver proton density fat fraction to assess hepatic steatosis. Radiology. 2013;267(2):422-31.

145. Ali AH, Petroski GF, Diaz-Arias AA, Al Juboori A, Wheeler AA, Ganga RR, et al. A model incorporating serum alkaline phosphatase for prediction of liver fibrosis in adults with obesity and nonalcoholic fatty liver disease. Journal of Clinical Medicine. 2021;10(15).

146. Fan R, Yu N, Li G, Arshad T, Liu WY, Wong GLH, et al. Machine-learning model comprising five clinical indices and liver stiffness measurement can accurately identify MASLD-related liver fibrosis. Liver International. 2023.

147. Tang A, Desai A, Hamilton G, Wolfson T, Gamst A, Lam J, et al. Accuracy of MR imaging-estimated proton density fat fraction for classification of dichotomized histologic steatosis grades in nonalcoholic fatty liver disease. Radiology. 2015;274(2):416-25.

148. Tavaglione F, De Vincentis A, Bruni V, Gallo IF, Carotti S, Tuccinardi D, et al. Accuracy of controlled attenuation parameter for assessing liver steatosis in individuals with morbid obesity before bariatric surgery. Liver International. 2022;42(2):374-83.

149. Marti-Aguado D, Arnouk J, Liang JX, Lara-Romero C, Behari J, Furlan A, et al. Development and validation of an image biomarker to identify metabolic dysfunction associated steatohepatitis: MR-MASH score. Liver Int. 2024;44(1):202-13.

150. Yoneda M, Suzuki K, Kato S, Fujita K, Nozaki Y, Hosono K, et al. Nonalcoholic fatty liver disease: US-based acoustic radiation force impulse elastography. Radiology. 2010;256(2):640-7.

151. Singh A, Gosai F, Siddiqui MT, Gupta M, Lopez R, Lawitz E, et al. Accuracy of noninvasive fibrosis scores to detect advanced fibrosis in patients with type-2 diabetes with biopsy-proven nonalcoholic fatty liver disease. Journal of Clinical Gastroenterology. 2020;54(10):891-7.

152. Loomba R, Wolfson T, Ang B, Hooker J, Behling C, Peterson M, et al. Magnetic resonance elastography predicts advanced fibrosis in patients with nonalcoholic fatty liver disease: a prospective study. Hepatology. 2014;60(6):1920-8.

153. Fierbinteanu Braticevici C, Sporea I, Panaitescu E, Tribus L. Value of acoustic radiation force impulse imaging elastography for non-invasive evaluation of patients with nonalcoholic fatty liver disease. Ultrasound in Medicine and Biology. 2013;39(11):1942-50.

154. Ahn Y, Yun SC, Lee SS, Son JH, Jo S, Byun J, et al. Development and Validation of a Simple Index Based on Non-Enhanced CT and Clinical Factors for Prediction of Non-Alcoholic Fatty Liver Disease. Korean J Radiol. 2020;21(4):413-21.

155. Park CC, Nguyen P, Hernandez C, Bettencourt R, Ramirez K, Fortney L, et al. Magnetic Resonance Elastography vs Transient Elastography in Detection of Fibrosis and Noninvasive Measurement of Steatosis in Patients With Biopsy-Proven Nonalcoholic Fatty Liver Disease. Gastroenterology. 2017;152(3):598-607.e2.

156. Cassinotto C, Boursier J, de Lédinghen V, Lebigot J, Lapuyade B, Cales P, et al. Liver stiffness in nonalcoholic fatty liver disease: A comparison of supersonic shear imaging, FibroScan, and ARFI with liver biopsy. Hepatology. 2016;63(6):1817-27.

157. Fedchuk L, Nascimbeni F, Pais R, Charlotte F, Housset C, Ratziu V. Performance and limitations of steatosis biomarkers in patients with nonalcoholic fatty liver disease. Alimentary Pharmacology and Therapeutics. 2014;40(10):1209-22.

158. McPherson S, Henderson E, Burt AD, Day CP, Anstee QM. Serum immunoglobulin levels predict fibrosis in patients with non-alcoholic fatty liver disease. Journal of Hepatology. 2014;60(5):1055-62.

159. Cui J, Heba E, Hernandez C, Haufe W, Hooker J, Andre MP, et al. Magnetic resonance elastography is superior to acoustic radiation force impulse for the Diagnosis of fibrosis in patients with biopsy-proven nonalcoholic fatty liver disease: A prospective study. Hepatology. 2016;63(2):453-61.

160. Younossi ZM, Stepanova M, Felix S, Jeffers T, Younossi E, Goodman Z, et al. The combination of the enhanced liver fibrosis and FIB-4 scores to determine significant fibrosis in patients with nonalcoholic fatty liver disease. Alimentary Pharmacology and Therapeutics. 2023;57(12):1417-22.

161. Anushiravani A, Alswat K, Dalekos GN, Zachou K, Örmeci N, Al-Busafi S, et al. Multicenter validation of FIB-6 as a novel machine learning non-invasive score to rule out liver cirrhosis in biopsy-proven MAFLD. Eur J Gastroenterol Hepatol. 2023;35(11):1284-8.

162. Darweesh SK, Omar H, Medhat E, Abd-Al Aziz RA, Ayman H, Saad Y, et al. The clinical usefulness of elastography in the evaluation of nonalcoholic fatty liver disease patients: A biopsy-controlled study. Eur J Gastroenterol Hepatol. 2019;31(8):1010-6.

163. Caussy C, Ajmera VH, Puri P, Hsu CL, Bassirian S, Mgdsyan M, et al. Serum metabolites detect the presence of advanced fibrosis in derivation and validation cohorts of patients with non-alcoholic fatty liver disease. Gut. 2019;68(10):1884-92.

164. Siddiqui MS, Yamada G, Vuppalanchi R, Van Natta M, Loomba R, Guy C, et al. Diagnostic Accuracy of Noninvasive Fibrosis Models to Detect Change in Fibrosis Stage. Clinical Gastroenterology and Hepatology. 2019;17(9):1877-85.e5.

165. Friedrich-Rust M, Romen D, Vermehren J, Kriener S, Sadet D, Herrmann E, et al. Acoustic radiation force impulse-imaging and transient elastography for non-invasive assessment of liver fibrosis and steatosis in NAFLD. Eur J Radiol. 2012;81(3):e325-31.

166. Chan WK, Sthaneshwar P, Mustapha NRN, Mahadeva S. Limited utility of plasma M30 in discriminating non-alcoholic steatohepatitis from steatosis - A comparison with routine biochemical markers. PLoS ONE. 2014;9(9).

167. Zhu SH, Zheng KI, Hu DS, Gao F, Rios RS, Li G, et al. Optimal thresholds for ultrasound attenuation parameter in the evaluation of hepatic steatosis severity: evidence from a cohort of patients with biopsy-proven fatty liver disease. European Journal of Gastroenterology and Hepatology. 2021;33(3):430-5.

168. Karlas T, Dietrich A, Peter V, Wittekind C, Lichtinghagen R, Garnov N, et al. Evaluation of Transient Elastography, Acoustic Radiation Force Impulse Imaging (ARFI), and Enhanced Liver Function (ELF) Score for Detection of Fibrosis in Morbidly Obese Patients. PLoS One. 2015;10(11):e0141649.

169. Chang PE, Goh GBB, Leow WQ, Shen L, Lim KH, Tan CK. Second harmonic generation microscopy provides accurate automated staging of liver fibrosis in patients with non-alcoholic fatty liver disease. PLoS One. 2018;13(6):e0199166.

170. Yang X, Chang X, Wu S, Sun X, Zhu X, Wang L, et al. Performance of liver stiffness measurements obtained with FibroScan is affected by glucose metabolism in patients with nonalcoholic fatty liver disease. Lipids in Health and Disease. 2021;20(1).

171. Palmeri ML, Wang MH, Rouze NC, Abdelmalek MF, Guy CD, Moser B, et al. Noninvasive evaluation of hepatic fibrosis using acoustic radiation force-based shear stiffness in patients with nonalcoholic fatty liver disease. J Hepatol. 2011;55(3):666-72.

172. Cichoz-Lach H, Celiński K, Prozorow-Król B, Swatek J, Słomka M, Lach T. The BARD score and the NAFLD fibrosis score in the assessment of advanced liver fibrosis in nonalcoholic fatty liver disease. Medical Science Monitor. 2012;18(12):CR735-CR40.

173. Polyzos SA, Slavakis A, Koumerkeridis G, Katsinelos P, Kountouras J. Noninvasive Liver Fibrosis Tests in Patients with Nonalcoholic Fatty Liver Disease: An External Validation Cohort. Horm Metab Res. 2019;51(2):134-40.

174. Lee MS, Bae JM, Joo SK, Woo H, Lee DH, Jung YJ, et al. Prospective comparison among transient elastography, supersonic shear imaging, and ARFI imaging for predicting fibrosis in nonalcoholic fatty liver disease. PLoS ONE. 2017;12(11).

175. Zang S, Ma X, Zhuang Z, Liu J, Bian D, Xun Y, et al. Increased ratio of neutrophil elastase to α1-antitrypsin is closely associated with liver inflammation in patients with nonalcoholic steatohepatitis. Clinical and Experimental Pharmacology and Physiology. 2016;43(1):13-21.

176. Runge JH, Smits LP, Verheij J, Depla A, Kuiken SD, Baak BC, et al. MR Spectroscopy-derived Proton Density Fat Fraction Is Superior to Controlled Attenuation Parameter for Detecting and Grading Hepatic Steatosis. Radiology. 2018;286(2):547-56.

177. de Souza Echeverria L, Mounzer DLS, Gestic MA, Utrini MP, Chaim FDM, Callejas-Neto F, et al. Fibrotic NASH in Individuals with Obesity: a Cross-sectional Analysis of the Prevalence of this Significant Milestone of Disease Progression and Accuracy of a Non-invasive Marker for its Screening. Obes Surg. 2024;34(2):389-95.

178. Zhang H, Rios RS, Boursier J, Anty R, Chan WK, George J, et al. Hepatocyte apoptosis fragment product cytokeratin-18 M30 level and non-alcoholic steatohepatitis risk diagnosis: an international registry study. Chin Med J (Engl). 2023;136(3):341-50.

179. Cunha GM, Thai TT, Hamilton G, Covarrubias Y, Schlein A, Middleton MS, et al. Accuracy of common proton density fat fraction thresholds for magnitude- and complex-based chemical shift-encoded MRI for assessing hepatic steatosis in patients with obesity. Abdom Radiol (NY). 2020;45(3):661-71.

180. Eren F, Kaya E, Yilmaz Y. Accuracy of Fibrosis-4 index and non-alcoholic fatty liver disease fibrosis scores in metabolic (dysfunction) associated fatty liver disease according to body mass index: failure in the prediction of advanced fibrosis in lean and morbidly obese individuals. European Journal of Gastroenterology and Hepatology. 2022;34(1):98-103.
